# Supplementary material for: Consensus Ensemble Multitarget Neural Network Model of Anxiolytic Activity of Chemical Compounds and Its Use for Multitarget Pharmacophore Design
Source: MDPI journal article supplement (doi:10.3390/ph16050731), 2023-05-11
Supplement: s1 [file s1]

**Table S7.** Training set for building a consensus ensemble multitarget neural network model of anxiolytic activity of chemical compounds relevant to chemotypes of nitrogen-containing condensed heterocycles.

| Mol_ID | Code          | Levels   | LevH | LevHM | LevA | ADRA1A | ADRA1B | ADRA2A | ADRA2B | AGTR1 | GABA-A-GABA | GABA-A-Benz | HTR1A | HTR2A-Spec | HTR2A-Allo | HTR4  | HTR7  | MTNR1A | MTNR1B | NMDA-Glut | NMDA-Ca | SLC18A2 | Sample1 | Sample2 | Sample3 | Sample4 | Sample5 | Sample6 | Sample7 |
|--------|---------------|----------|------|-------|------|--------|--------|--------|--------|-------|-------------|-------------|-------|------------|------------|-------|-------|--------|--------|-----------|---------|---------|---------|---------|---------|---------|---------|---------|---------|
| 1      | CHEMBL323519  | high     | h    | hm    | a    | -6.4   | -7.7   | -7.6   | -5.6   | -8.8  | -6.6        | -8.3        | -7.8  | -7.5       | -8.9       | -8.1  | -7.1  | -7.6   | -6.9   | -7.2      | -7.0    | -4.3    | train   | val     | test    | train   | train   | train   | train   |
| 2      | CHEMBL204240  | high     | h    | hm    | a    | -7.5   | -7.1   | -7.6   | -5.1   | -7.8  | -6.4        | -8.5        | -7.8  | -6.8       | -8.2       | -8.2  | -7.6  | -8.6   | -7.8   | -6.7      | -6.4    | -4.1    | train   | train   | val     | test    | train   | train   | train   |
| 3      | CHEMBL314608  | high     | h    | hm    | a    | -6.4   | -7.3   | -7.8   | -5.6   | -7.9  | -6.3        | -8.3        | -7.9  | -7.0       | -8.4       | -8.1  | -7.7  | -8.0   | -8.5   | -7.0      | -6.2    | -5.0    | train   | train   | train   | val     | test    | train   | train   |
| 4      | CHEMBL319178  | high     | h    | hm    | a    | -8.1   | -8.7   | -10.4  | -6.5   | -9.7  | -7.5        | -10.1       | -10.4 | -8.5       | -11.1      | -9.7  | -9.7  | -9.6   | -8.5   | -8.6      | -8.7    | -5.8    | train   | train   | train   | train   | val     | test    | train   |
| 5      | CHEMBL153823  | high     | h    | hm    | a    | -7.7   | -7.0   | -8.2   | -9.2   | -8.1  | -6.5        | -8.8        | -7.7  | -6.9       | -8.6       | -7.8  | -8.6  | -8.4   | -8.9   | -7.3      | -7.4    | -5.9    | train   | train   | train   | train   | train   | val     | test    |
| 6      | CHEMBL3246317 | high     | h    | hm    | a    | -8.3   | -8.2   | -8.5   | -8.1   | -8.9  | -7.7        | -10.1       | -9.1  | -7.9       | -9.7       | -9.2  | -9.4  | -8.2   | -9.6   | -7.0      | -7.2    | -5.4    | test    | train   | train   | train   | train   | train   | val     |
| 7      | CHEMBL98258   | high     | h    | hm    | a    | -8.5   | -8.6   | -10.6  | -6.6   | -9.6  | -7.7        | -10.4       | -10.7 | -8.7       | -11.4      | -10.2 | -9.8  | -8.7   | -7.4   | -8.4      | -8.9    | -5.9    | val     | test    | train   | train   | train   | train   | train   |
| 8      | CHEMBL155270  | high     | h    | hm    | a    | -7.9   | -7.2   | -8.4   | -8.9   | -7.7  | -6.2        | -8.7        | -7.7  | -6.8       | -8.4       | -7.6  | -8.4  | -8.2   | -8.5   | -7.1      | -7.4    | -4.6    | train   | val     | test    | train   | train   | train   | train   |
| 9      | CHEMBL86611   | high     | h    | hm    | a    | -7.3   | -7.1   | -7.2   | -6.5   | -7.3  | -6.2        | -7.7        | -7.7  | -6.5       | -8.2       | -7.8  | -7.3  | -7.9   | -8.0   | -6.7      | -6.1    | -4.6    | train   | train   | val     | test    | train   | train   | train   |
| 10     | CHEMBL87790   | high     | h    | hm    | a    | -7.1   | -6.9   | -6.8   | -6.7   | -7.2  | -6.1        | -7.6        | -7.1  | -6.1       | -8.0       | -7.4  | -7.2  | -8.3   | -8.0   | -6.3      | -5.7    | -4.4    | train   | train   | train   | val     | test    | train   | train   |
| 11     | CHEMBL319966  | high     | h    | hm    | a    | -9.0   | -8.5   | -9.4   | -7.1   | -9.0  | -7.9        | -9.3        | -9.2  | -7.6       | -10.5      | -8.7  | -9.3  | -9.9   | -9.4   | -7.5      | -7.8    | -5.1    | train   | train   | train   | train   | val     | test    | train   |
| 12     | CHEMBL88106   | high     | h    | hm    | a    | -7.3   | -7.1   | -7.0   | -6.0   | -7.5  | -6.4        | -8.1        | -7.7  | -6.5       | -8.2       | -7.8  | -7.5  | -8.1   | -8.1   | -6.4      | -6.1    | -4.6    | train   | train   | train   | train   | train   | val     | test    |
| 13     | CHEMBL86557   | high     | h    | hm    | a    | -7.6   | -7.1   | -7.5   | -5.9   | -7.8  | -6.7        | -8.0        | -8.1  | -6.8       | -8.4       | -8.0  | -7.7  | -8.7   | -8.3   | -6.6      | -6.6    | -4.7    | test    | train   | train   | train   | train   | train   | val     |
| 14     | CHEMBL2263293 | high     | h    | hm    | a    | -8.3   | -7.9   | -8.6   | -6.3   | -8.6  | -8.0        | -9.6        | -9.1  | -8.0       | -9.9       | -8.6  | -7.6  | -7.5   | -8.3   | -7.4      | -7.1    | -4.5    | val     | test    | train   | train   | train   | train   | train   |
| 15     | CHEMBL20042   | high     | h    | hm    | a    | -8.7   | -8.4   | -9.4   | -6.1   | -9.4  | -7.0        | -9.6        | -9.1  | -7.4       | -10.0      | -8.6  | -7.9  | -8.1   | -9.3   | -8.0      | -7.6    | -5.4    | train   | val     | test    | train   | train   | train   | train   |
| 16     | CHEMBL101304  | high     | h    | hm    | a    | -7.4   | -8.6   | -7.7   | -5.4   | -8.3  | -6.5        | -8.4        | -8.0  | -7.5       | -9.8       | -8.3  | -7.7  | -9.5   | -9.8   | -6.9      | -6.9    | -4.4    | train   | train   | val     | test    | train   | train   | train   |
| 17     | CHEMBL2263296 | high     | h    | hm    | a    | -8.3   | -8.0   | -9.5   | -6.7   | -9.5  | -8.7        | -9.9        | -9.8  | -8.3       | -9.9       | -8.5  | -8.3  | -8.2   | -8.4   | -7.7      | -8.1    | -5.3    | train   | train   | train   | val     | test    | train   | train   |
| 18     | CHEMBL260994  | high     | h    | hm    | a    | -8.2   | -8.6   | -9.1   | -6.3   | -9.7  | -7.5        | -9.9        | -9.5  | -7.9       | -9.8       | -8.7  | -8.8  | -8.2   | -8.8   | -8.2      | -8.2    | -5.4    | train   | train   | train   | train   | val     | test    | train   |
| 19     | CHEMBL347801  | high     | h    | hm    | a    | -8.0   | -7.3   | -8.6   | -8.7   | -8.2  | -6.6        | -9.0        | -8.0  | -7.1       | -8.8       | -8.0  | -9.0  | -8.7   | -9.1   | -7.5      | -7.7    | -4.8    | train   | train   | train   | train   | train   | val     | test    |
| 20     | CHEMBL4093093 | high     | h    | hm    | a    | -8.3   | -8.2   | -8.9   | -6.0   | -9.6  | -7.1        | -9.5        | -9.3  | -8.2       | -9.7       | -8.6  | -8.3  | -8.7   | -9.0   | -7.7      | -7.3    | -5.2    | test    | train   | train   | train   | train   | train   | val     |
| 21     | CHEMBL661     | high     | h    | hm    | a    | -8.7   | -8.4   | -8.6   | -8.1   | -9.3  | -7.3        | -10.6       | -9.3  | -8.2       | -9.3       | -9.5  | -10.1 | -9.2   | -9.9   | -7.1      | -7.6    | -5.5    | val     | test    | train   | train   | train   | train   | train   |
| 22     | CHEMBL562219  | high     | h    | hm    | a    | -8.0   | -7.4   | -8.1   | -5.1   | -8.8  | -6.4        | -8.0        | -8.1  | -7.1       | -8.9       | -8.4  | -8.5  | -9.1   | -9.5   | -6.6      | -6.7    | -4.6    | train   | val     | test    | train   | train   | train   | train   |
| 23     | CHEMBL2263292 | high     | h    | hm    | a    | -8.3   | -7.9   | -8.7   | -6.4   | -8.9  | -7.3        | -9.7        | -9.1  | -8.0       | -9.8       | -8.5  | -7.9  | -7.6   | -8.2   | -7.6      | -7.5    | -4.5    | train   | train   | val     | test    | train   | train   | train   |
| 24     | CHEMBL470786  | high     | h    | hm    | a    | -7.5   | -7.3   | -8.2   | -6.1   | -8.3  | -6.5        | -8.8        | -7.7  | -7.1       | -8.2       | -8.1  | -7.5  | -7.7   | -8.0   | -7.3      | -6.7    | -4.4    | train   | train   | train   | val     | test    | train   | train   |
| 25     | CHEMBL469737  | high     | h    | hm    | a    | -8.3   | -7.3   | -9.0   | -6.1   | -9.1  | -7.1        | -9.7        | -8.1  | -7.4       | -11.1      | -8.7  | -6.8  | -9.5   | -7.0   | -7.8      | -7.6    | -2.9    | train   | train   | train   | train   | val     | test    | train   |
| 26     | CHEMBL378298  | high     | h    | hm    | a    | -8.0   | -8.8   | -9.4   | -6.2   | -9.0  | -7.4        | -9.4        | -9.3  | -8.6       | -10.6      | -8.9  | -8.7  | -8.8   | -7.6   | -7.8      | -8.7    | -2.9    | train   | train   | train   | train   | train   | val     | test    |
| 27     | CHEMBL646     | high     | h    | hm    | a    | -8.9   | -8.7   | -8.6   | -8.2   | -9.1  | -7.5        | -10.2       | -8.5  | -8.6       | -9.5       | -9.2  | -9.5  | -9.0   | -9.8   | -7.2      | -7.7    | -5.8    | test    | train   | train   | train   | train   | train   | val     |
| 28     | Diazepam      | high     | h    | hm    | a    | -7.0   | -8.2   | -8.4   | -8.2   | -8.8  | -6.8        | -9.4        | -8.3  | -7.5       | -8.8       | -8.5  | -9.3  | -9.2   | -9.0   | -7.4      | -7.1    | -4.9    | val     | test    | train   | train   | train   | train   | train   |
| 29     | Phenazepam    | high     | h    | hm    | a    | -7.8   | -8.0   | -9.1   | -8.3   | -8.8  | -6.9        | -10.4       | -8.1  | -7.7       | -8.7       | -8.3  | -9.3  | -8.9   | -9.7   | -6.7      | -7.1    | -5.1    | train   | val     | test    | train   | train   | train   | train   |
| 30     | Tofisopam     | high     | h    | hm    | a    | -6.4   | -8.1   | -7.5   | -5.8   | -8.4  | -6.7        | -8.4        | -8.4  | -7.4       | -8.7       | -9.2  | -7.1  | -8.1   | -10.3  | -6.9      | -6.7    | -3.3    | train   | train   | val     | test    | train   | train   | train   |
| 31     | CHEMBL470788  | moderate | nh   | hm    | a    | -8.1   | -7.3   | -7.5   | -5.9   | -8.4  | -7.1        | -8.9        | -7.7  | -7.2       | -8.8       | -8.8  | -7.2  | -6.7   | -8.4   | -7.1      | -7.1    | -4.6    | train   | train   | train   | val     | test    | train   | train   |
| 32     | CHEMBL471822  | moderate | nh   | hm    | a    | -7.8   | -7.4   | -8.5   | -6.1   | -8.3  | -6.4        | -8.6        | -7.8  | -6.9       | -9.1       | -8.6  | -7.5  | -7.9   | -7.8   | -7.4      | -7.0    | -4.3    | train   | train   | train   | train   | val     | test    | train   |
| 33     | CHEMBL470787  | moderate | nh   | hm    | a    | -8.3   | -8.3   | -8.3   | -7.6   | -8.5  | -7.2        | -9.3        | -8.6  | -7.4       | -9.3       | -8.7  | -7.8  | -7.9   | -9.1   | -7.6      | -7.6    | -5.0    | train   | train   | train   | train   | train   | val     | test    |
| 34     | CHEMBL204040  | moderate | nh   | hm    | a    | -7.2   | -7.1   | -7.7   | -5.3   | -7.8  | -6.3        | -8.5        | -7.6  | -7.0       | -8.4       | -8.0  | -7.6  | -8.4   | -7.9   | -6.6      | -6.3    | -4.1    | test    | train   | train   | train   | train   | train   | val     |
| 35     | CHEMBL154043  | moderate | nh   | hm    | a    | -7.4   | -7.4   | -8.3   | -8.7   | -7.7  | -6.7        | -8.6        | -7.6  | -6.9       | -8.4       | -7.8  | -8.3  | -8.1   | -8.5   | -7.2      | -7.0    | -5.8    | val     | test    | train   | train   | train   | train   | train   |
| 36     | CHEMBL283993  | moderate | nh   | hm    | a    | -8.0   | -7.8   | -8.9   | -6.0   | -9.4  | -7.0        | -9.5        | -8.3  | -7.4       | -10.9      | -9.0  | -8.4  | -8.8   | -8.5   | -7.5      | -7.7    | -5.2    | train   | val     | test    | train   | train   | train   | train   |
| 37     | CHEMBL314823  | moderate | nh   | hm    | a    | -6.8   | -6.7   | -6.9   | -7.2   | -7.0  | -5.8        | -8.0        | -7.3  | -6.2       | -7.5       | -7.5  | -7.0  | -7.4   | -7.5   | -6.2      | -5.6    | -4.6    | train   | train   | val     | test    | train   | train   | train   |
| 38     | CHEMBL315419  | moderate | nh   | hm    | a    | -6.9   | -7.0   | -6.9   | -5.7   | -7.0  | -5.9        | -7.7        | -7.4  | -6.3       | -7.7       | -7.3  | -6.8  | -7.3   | -7.4   | -6.2      | -5.6    | -4.3    | train   | train   | train   | val     | test    | train   | train   |
| 39     | CHEMBL3246236 | moderate | nh   | hm    | a    | -7.0   | -7.5   | -7.7   | -7.7   | -8.2  | -6.5        | -9.1        | -8.0  | -7.5       | -9.3       | -8.3  | -8.2  | -9.0   | -8.6   | -7.3      | -7.2    | -4.5    | train   | train   | train   | train   | val     | test    | train   |
| 40     | CHEMBL328250  | moderate | nh   | hm    | a    | -8.1   | -8.5   | -8.3   | -6.0   | -9.1  | -7.0        | -9.9        | -9.2  | -7.6       | -9.0       | -8.0  | -7.0  | -8.0   | -8.7   | -6.9      | -7.0    | -5.5    | train   | train   | train   | train   | train   | val     | test    |
| 41     | CHEMBL411663  | moderate | nh   | hm    | a    | -8.6   | -8.3   | -9.2   | -6.4   | -9.6  | -7.1        | -10.0       | -9.5  | -8.2       | -10.2      | -8.6  | -9.0  | -8.4   | -9.3   | -8.1      | -8.2    | -5.2    | test    | train   | train   | train   | train   | train   | val     |
| 42     | CHEMBL420977  | moderate | nh   | hm    | a    | -7.2   | -7.0   | -6.9   | -6.5   | -7.1  | -6.2        | -7.8        | -7.4  | -6.3       | -7.9       | -7.6  | -7.3  | -7.9   | -7.9   | -6.3      | -5.9    | -4.6    | val     | test    | train   | train   | train   | train   | train   |
| 43     | CHEMBL431020  | moderate | nh   | hm    | a    | -7.1   | -6.9   | -7.3   | -6.5   | -7.4  | -6.1        | -7.9        | -7.6  | -6.5       | -7.9       | -7.7  | -7.3  | -7.7   | -8.1   | -6.4      | -6.1    | -4.6    | train   | val     | test    | train   | train   | train   | train   |
| 44     | CHEMBL523     | moderate | nh   | hm    | a    | -7.9   | -8.3   | -8.2   | -8.0   | -8.5  | -6.8        | -9.6        | -8.3  | -7.1       | -8.7       | -8.6  | -9.4  | -9.4   | -9.1   | -7.0      | -7.3    | -4.7    | train   | train   | val     | test    | train   | train   | train   |
| 45     | CHEMBL83085   | moderate | nh   | hm    | a    | -7.2   | -6.9   | -7.3   | -6.3   | -7.5  | -6.1        | -7.5        | -7.7  | -6.4       | -8.1       | -7.9  | -7.0  | -8.1   | -8.0   | -6.4      | -5.9    | -4.4    | train   | train   | train   | val     | test    | train   | train   |
| 46     | CHEMBL83349   | moderate | nh   | hm    | a    | -7.0   | -7.1   | -7.0   | -6.4   | -7.1  | -6.1        | -7.7        | -7.4  | -6.3       | -7.9       | -7.6  | -6.9  | -7.9   | -7.6   | -6.2      | -5.8    | -4.2    | train   | train   | train   | train   | val     | test    | train   |
| 47     | CHEMBL86463   | moderate | nh   | hm    | a    | -6.9   | -7.0   | -6.9   | -6.4   | -7.2  | -5.8        | -7.7        | -7.2  | -6.3       | -7.8       | -7.3  | -6.7  | -8.0   | -7.8   | -6.4      | -5.6    | -4.6    | train   | train   | train   | train   | train   | val     | test    |
| 48     | CHEMBL87700   | moderate | nh   | hm    | a    | -7.3   | -7.0   | -7.2   | -6.4   | -7.6  | -6.4        | -8.0        | -7.8  | -6.5       | -8.2       | -7.7  | -7.5  | -8.1   | -8.0   | -6.7      | -6.1    | -4.7    | test    | train   | train   | train   | train   | train   | val     |
| 49     | CHEMBL98848   | moderate | nh   | hm    | a    | -9.2   | -8.7   | -9.6   | -7.4   | -9.2  | -7.6        | -10.4       | -9.4  | -8.3       | -10.8      | -9.1  | -9.0  | -9.6   | -8.8   | -7.9      | -8.3    | -5.3    | val     | test    | train   | train   | train   | train   | train   |
| 50     | CHEMBL969     | moderate | nh   | hm    | a    | -8.6   | -7.8   | -8.2   | -8.1   | -8.8  | -6.8        | -10.0       | -9.5  | -7.5       | -9.1       | -8.1  | -8.2  | -9.7   | -10.3  | -6.6      | -7.5    | -5.3    | train   | val     | test    | train   | train   | train   | train   |
| 51     | CHEMBL431105  | moderate | nh   | hm    | a    | -7.5   | -7.6   | -8.7   | -5.7   | -8.4  | -7.3        | -9.1        | -8.0  | -8.0       | -9.2       | -8.0  | -8.0  | -8.0   | -7.5   | -6.8      | -7.0    | -4.1    | train   | train   | val     | test    | train   | train   | train   |
| 52     | CHEMBL204755  | moderate | nh   | hm    | a    | -7.7   | -7.1   | -7.9   | -5.3   | -7.5  | -6.5        | -8.5        | -7.5  | -6.6       | -8.4       | -7.7  | -7.5  | -8.5   | -7.9   | -6.8      | -6.5    | -4.2    | train   | train   | train   | val     | test    | train   | train   |
| 53     | CHEMBL383127  | moderate | nh   | hm    | a    | -7.9   | -7.3   | -8.5   | -6.7   | -7.5  | -6.7        | -9.4        | -8.0  | -6.8       | -8.4       | -7.9  | -8.2  | -8.8   | -8.3   | -7.2      | -7.0    | -4.2    | train   | train   | train   | train   | val     | test    | train   |

|     |               |          |    |     |   |      |       |       |      |      |      |       |       |      |       |       |      |       |       |      |      |      |       |       |       |       |       |       |       |
|-----|---------------|----------|----|-----|---|------|-------|-------|------|------|------|-------|-------|------|-------|-------|------|-------|-------|------|------|------|-------|-------|-------|-------|-------|-------|-------|
| 65  | CHEMBL314033  | moderate | nh | hm  | a | -6.7 | -6.8  | -7.1  | -6.2 | -7.2 | -5.7 | -7.7  | -7.2  | -6.6 | -7.9  | -7.6  | -6.9 | -7.8  | -7.6  | -6.2 | -6.1 | -4.3 | train | train | val   | test  | train | train | train |
| 66  | CHEMBL99303   | moderate | nh | hm  | a | -8.6 | -8.6  | -10.0 | -6.7 | -9.3 | -7.7 | -9.6  | -10.8 | -8.7 | -11.4 | -9.7  | -8.9 | -8.1  | -7.1  | -8.2 | -8.6 | 5.9  | train | train | train | val   | test  | train | train |
| 67  | CHEMBL345344  | moderate | nh | hm  | a | -7.8 | -6.8  | -8.0  | -9.0 | -7.5 | -6.0 | -8.5  | -7.3  | -6.6 | -8.1  | -7.3  | -8.0 | -7.9  | -8.3  | -7.0 | -7.0 | -5.6 | train | train | train | train | val   | test  | train |
| 68  | CHEMBL87973   | moderate | nh | hm  | a | -7.2 | -6.9  | -7.3  | -6.0 | -7.4 | -6.3 | -7.8  | -7.8  | -6.5 | -8.1  | -7.7  | -7.1 | -8.5  | -7.9  | -6.5 | -6.3 | -4.5 | train | train | train | train | train | val   | test  |
| 69  | CHEMBL207493  | moderate | nh | hm  | a | -7.3 | -8.5  | -8.7  | -6.6 | -9.3 | -7.1 | -9.0  | -8.9  | -8.5 | -9.6  | -9.0  | -8.3 | -8.5  | -7.9  | -7.8 | -8.4 | -4.2 | test  | train | train | train | train | train | val   |
| 70  | CHEMBL231825  | moderate | nh | hm  | a | -7.7 | -9.5  | -9.7  | -5.8 | -9.9 | -7.7 | -9.4  | -9.8  | -9.6 | -10.3 | -9.4  | -8.8 | -8.7  | -7.1  | -8.4 | -8.8 | -2.9 | val   | test  | train | train | train | train | train |
| 71  | CHEMBL87598   | moderate | nh | hm  | a | -6.7 | -6.9  | -7.0  | -5.2 | -7.7 | -5.9 | -8.1  | -7.4  | -6.8 | -7.8  | -7.5  | -7.0 | -7.9  | -8.0  | -6.0 | -6.3 | -4.6 | train | val   | test  | train | train | train | train |
| 72  | CHEMBL261209  | moderate | nh | hm  | a | -8.1 | -8.6  | -9.0  | -6.3 | -9.7 | -7.3 | -10.1 | -9.6  | -8.2 | -9.9  | -8.9  | -9.5 | -8.6  | -8.9  | -8.4 | -8.3 | -5.4 | train | train | val   | test  | train | train | train |
| 73  | CHEMBL2263295 | moderate | nh | hm  | a | -7.9 | -7.7  | -9.0  | -6.1 | -9.0 | -8.4 | -9.6  | -8.7  | -7.8 | -9.3  | -7.9  | -8.5 | -8.0  | -8.2  | -7.4 | -7.3 | -6.0 | train | train | train | val   | test  | train | train |
| 74  | CHEMBL86761   | moderate | nh | hm  | a | -6.4 | -6.7  | -7.1  | -5.1 | -7.3 | -5.8 | -7.3  | -7.3  | -6.3 | -7.7  | -7.5  | -7.3 | -7.2  | -7.1  | -6.0 | -6.0 | -4.1 | train | train | train | train | val   | test  | train |
| 75  | CHEMBL2263297 | moderate | nh | hm  | a | -7.7 | -7.6  | -8.7  | -6.0 | -8.8 | -8.4 | -9.6  | -8.7  | -7.6 | -9.1  | -7.7  | -7.8 | -7.1  | -7.3  | -7.3 | -7.2 | -5.5 | train | train | train | train | train | val   | test  |
| 76  | CHEMBL2263294 | moderate | nh | hm  | a | -8.2 | -7.7  | -8.6  | -6.6 | -8.6 | -8.5 | -9.9  | -9.1  | -8.0 | -9.8  | -8.2  | -8.1 | -7.8  | -7.8  | -7.8 | -7.8 | -4.7 | test  | train | train | train | train | train | val   |
| 77  | CHEMBL2263298 | moderate | nh | hm  | a | -8.3 | -7.8  | -8.6  | -6.1 | -8.7 | -8.2 | -9.4  | -8.3  | -7.9 | -9.4  | -7.9  | -8.4 | -8.5  | -8.6  | -7.6 | -7.2 | -5.6 | val   | test  | train | train | train | train | train |
| 78  | CHEMBL445     | moderate | nh | hm  | a | -8.8 | -8.1  | -8.1  | -8.5 | -8.7 | -7.4 | -8.1  | -8.2  | -7.6 | -8.9  | -8.3  | -9.3 | -9.4  | -10.1 | -6.7 | -7.8 | -4.5 | train | val   | test  | train | train | train | train |
| 79  | CHEMBL87115   | moderate | nh | hm  | a | -6.8 | -6.6  | -7.3  | -8.0 | -7.2 | -5.8 | -7.6  | -7.1  | -6.4 | -7.4  | -7.0  | -7.5 | -7.7  | -7.4  | -6.2 | -5.7 | -5.9 | train | train | val   | test  | train | train | train |
| 80  | CHEMBL471820  | moderate | nh | hm  | a | -7.4 | -7.5  | -8.2  | -6.2 | -8.2 | -6.9 | -9.0  | -7.9  | -7.3 | -8.8  | -8.6  | -7.2 | -7.8  | -7.6  | -7.3 | -6.9 | -4.7 | train | train | train | val   | test  | train | train |
| 81  | CHEMBL3277547 | moderate | nh | hm  | a | -7.5 | -7.6  | -7.8  | -5.4 | -7.4 | -7.0 | -9.0  | -7.6  | -7.2 | -8.0  | -7.7  | -7.5 | -8.6  | -8.1  | -6.5 | -6.8 | -4.4 | train | train | train | train | val   | test  | train |
| 82  | CHEMBL4098854 | moderate | nh | hm  | a | -7.9 | -9.9  | -9.1  | -6.8 | -9.3 | -8.2 | -10.1 | -8.8  | -8.9 | -10.2 | -9.6  | -8.8 | -7.9  | -9.8  | -8.1 | -8.1 | -4.6 | train | train | train | train | train | val   | test  |
| 83  | CHEMBL4099053 | moderate | nh | hm  | a | -7.6 | -8.4  | -8.5  | -5.9 | -8.2 | -7.0 | -8.0  | -8.2  | -8.1 | -9.4  | -9.1  | -6.6 | -8.4  | -8.1  | -7.8 | -7.1 | -5.6 | test  | train | train | train | train | train | val   |
| 84  | CHEMBL585105  | moderate | nh | hm  | a | -7.9 | -8.7  | -9.2  | -6.6 | -8.8 | -7.3 | -9.7  | -9.9  | -8.4 | -10.5 | -8.9  | -8.1 | -8.9  | -7.0  | -7.9 | -8.0 | -4.9 | val   | test  | train | train | train | train | train |
| 85  | CHEMBL509913  | moderate | nh | hm  | a | -9.7 | -9.5  | -9.8  | -6.9 | -9.7 | -7.8 | -10.8 | -10.0 | -8.5 | -11.3 | -10.7 | -8.7 | -8.6  | -8.6  | -8.9 | -8.3 | -5.7 | train | val   | test  | train | train | train | train |
| 86  | CHEMBL513711  | moderate | nh | hm  | a | -7.1 | -7.0  | -9.1  | -6.7 | -9.0 | -7.0 | -9.2  | -8.5  | -7.7 | -11.1 | -8.6  | -7.2 | -9.0  | -6.8  | -7.9 | -7.8 | -1.2 | train | train | val   | test  | train | train | train |
| 87  | CHEMBL86304   | moderate | nh | hm  | a | -7.1 | -6.6  | -7.3  | -6.4 | -7.2 | -6.0 | -8.0  | -7.1  | -6.4 | -7.7  | -7.2  | -7.1 | -7.4  | -7.4  | -6.3 | -6.1 | -4.0 | train | train | train | val   | test  | train | train |
| 88  | CHEMBL204091  | moderate | nh | hm  | a | -7.8 | -7.0  | -7.5  | -5.5 | -7.9 | -6.1 | -8.8  | -7.7  | -6.6 | -8.3  | -7.5  | -7.4 | -8.8  | -8.9  | -6.8 | -6.4 | -4.1 | train | train | train | train | val   | test  | train |
| 89  | CHEMBL517725  | moderate | nh | hm  | a | -7.9 | -10.0 | -9.8  | -6.3 | -9.7 | -8.1 | -10.2 | -9.9  | -8.4 | -9.7  | -9.9  | -7.7 | -11.4 | -9.9  | -8.5 | -8.8 | -5.2 | train | train | train | train | train | val   | test  |
| 90  | CHEMBL1949963 | moderate | nh | hm  | a | -8.2 | -8.6  | -9.4  | -6.4 | -8.9 | -7.4 | -10.0 | -9.3  | -8.6 | -10.8 | -9.2  | -9.1 | -8.7  | -9.7  | -8.1 | -8.1 | -5.0 | test  | train | train | train | train | train | val   |
| 91  | CHEMBL4068928 | moderate | nh | hm  | a | -8.1 | -9.8  | -9.3  | -6.9 | -9.6 | -8.6 | -10.4 | -9.4  | -9.3 | -10.1 | -9.4  | -9.0 | -10.5 | -10.9 | -8.2 | -8.6 | -4.7 | val   | test  | train | train | train | train | train |
| 92  | CHEMBL443986  | moderate | nh | hm  | a | -6.9 | -7.5  | -8.5  | -5.5 | -8.0 | -6.4 | -9.1  | -8.0  | -7.1 | -8.1  | -8.0  | -6.8 | -7.1  | -8.6  | -7.2 | -6.3 | -4.2 | train | val   | test  | train | train | train | train |
| 93  | CHEMBL49      | moderate | nh | hm  | a | -7.7 | -8.8  | -8.1  | -6.2 | -8.8 | -7.0 | -8.8  | -8.8  | -8.3 | -9.5  | -8.7  | -7.9 | -7.3  | -7.9  | -7.5 | -7.8 | -4.6 | train | train | val   | test  | train | train | train |
| 94  | Afobazol      | moderate | nh | hm  | a | -6.5 | -6.5  | -7.2  | -5.0 | -7.5 | -5.9 | -7.3  | -7.1  | -6.7 | -7.4  | -7.1  | -7.6 | -7.0  | -7.6  | -6.2 | -6.0 | -4.1 | train | train | train | val   | test  | train | train |
| 95  | CHEMBL315315  | low      | nh | nhm | a | -5.8 | -6.3  | -6.3  | -6.7 | -7.0 | -5.4 | -7.5  | -6.9  | -6.1 | -7.3  | -7.2  | -6.5 | -7.0  | -7.2  | -5.9 | -5.5 | -3.9 | train | train | train | train | val   | test  | train |
| 96  | CHEMBL315768  | low      | nh | nhm | a | -6.2 | -6.4  | -6.8  | -6.9 | -7.1 | -5.6 | -7.4  | -7.0  | -6.2 | -7.4  | -7.1  | -6.5 | -7.6  | -7.6  | -6.2 | -5.6 | -4.4 | train | train | train | train | train | val   | test  |
| 97  | CHEMBL412630  | low      | nh | nhm | a | -6.0 | -7.0  | -6.9  | -4.8 | -7.5 | -5.8 | -6.6  | -7.0  | -6.8 | -7.2  | -7.3  | -6.0 | -8.4  | -7.8  | -5.8 | -5.6 | -3.6 | test  | train | train | train | train | train | val   |
| 98  | CHEMBL204581  | low      | nh | nhm | a | -8.5 | -7.8  | -8.9  | -5.8 | -8.5 | -6.6 | -9.3  | -8.5  | -7.1 | -9.4  | -8.1  | -8.3 | -9.6  | -9.7  | -7.7 | -7.2 | -4.9 | val   | test  | train | train | train | train | train |
| 99  | CHEMBL203902  | low      | nh | nhm | a | -8.2 | -7.5  | -8.6  | -5.7 | -8.3 | -6.2 | -8.9  | -7.9  | -6.7 | -9.2  | -7.8  | -8.0 | -9.2  | -9.0  | -7.1 | -7.3 | -4.7 | train | val   | test  | train | train | train | train |
| 100 | CHEMBL3144798 | low      | nh | nhm | a | -8.6 | -7.4  | -9.0  | -7.6 | -8.3 | -6.6 | -9.4  | -8.8  | -7.0 | -9.1  | -7.9  | -8.6 | -9.5  | -9.2  | -7.4 | -7.6 | -5.1 | train | train | val   | test  | train | train | train |
| 101 | CHEMBL87509   | low      | nh | nhm | a | -7.3 | -7.4  | -7.2  | -5.7 | -7.7 | -6.2 | -8.0  | -7.9  | -6.9 | -8.4  | -7.9  | -8.2 | -8.0  | -8.3  | -6.6 | -6.5 | -4.4 | train | train | train | val   | test  | train | train |
| 102 | CHEMBL314780  | low      | nh | nhm | a | -6.1 | -6.1  | -6.7  | -6.8 | -6.7 | -5.6 | -7.3  | -6.8  | -6.0 | -7.3  | -6.8  | -7.4 | -7.2  | -7.6  | -6.0 | -5.2 | -3.9 | train | train | train | train | val   | test  | train |
| 103 | CHEMBL85228   | low      | nh | nhm | a | -6.5 | -6.9  | -7.0  | -5.1 | -7.4 | -5.7 | -7.6  | -7.5  | -6.6 | -7.5  | -7.5  | -7.2 | -7.3  | -7.6  | -6.0 | -5.7 | -4.2 | train | train | train | train | train | val   | test  |
| 104 | CHEMBL413575  | low      | nh | nhm | a | -8.4 | -7.7  | -8.2  | -7.2 | -7.4 | -6.6 | -9.0  | -7.9  | -6.9 | -8.8  | -8.1  | -7.7 | -8.7  | -8.1  | -6.8 | -7.0 | -3.7 | test  | train | train | train | train | train | val   |
| 105 | CHEMBL407263  | low      | nh | nhm | a | -9.0 | -7.5  | -9.9  | -6.7 | -9.6 | -6.5 | -10.8 | -9.8  | -7.5 | -10.4 | -8.3  | -9.4 | -8.9  | -10.2 | -8.1 | -8.1 | -5.5 | val   | test  | train | train | train | train | train |
| 106 | CHEMBL87251   | low      | nh | nhm | a | -6.4 | -6.6  | -6.9  | -6.3 | -7.4 | -6.2 | -7.8  | -7.6  | -6.5 | -8.1  | -7.7  | -7.0 | -8.1  | -8.0  | -6.6 | -6.1 | -4.7 | train | val   | test  | train | train | train | train |
| 107 | CHEMBL204081  | low      | nh | nhm | a | -7.7 | -8.1  | -7.8  | -5.7 | -8.0 | -6.7 | -8.7  | -8.3  | -7.3 | -8.3  | -7.7  | -8.2 | -8.3  | -7.6  | -6.7 | -6.7 | -4.3 | train | train | val   | test  | train | train | train |
| 108 | CHEMBL204748  | low      | nh | nhm | a | -8.3 | -7.8  | -8.1  | -6.0 | -8.0 | -6.8 | -9.2  | -8.5  | -7.1 | -9.4  | -7.9  | -8.2 | -8.5  | -8.6  | -7.5 | -7.0 | -4.7 | train | train | train | val   | test  | train | train |
| 109 | CHEMBL206675  | low      | nh | nhm | a | -7.5 | -7.5  | -7.5  | -7.0 | -7.8 | -6.5 | -8.6  | -7.8  | -7.3 | -8.1  | -7.8  | -8.1 | -8.3  | -8.1  | -6.9 | -6.3 | -4.9 | train | train | train | train | val   | test  | train |
| 110 | CHEMBL204027  | low      | nh | nhm | a | -7.3 | -6.9  | -7.7  | -5.1 | -7.7 | -6.1 | -7.8  | -7.6  | -7.0 | -7.8  | -7.8  | -7.5 | -8.0  | -8.1  | -6.6 | -5.9 | -4.0 | train | train | train | train | train | val   | test  |
| 111 | CHEMBL383066  | low      | nh | nhm | a | -7.6 | -7.1  | -8.0  | -6.9 | -7.8 | -6.4 | -8.9  | -7.9  | -6.6 | -8.1  | -7.7  | -7.6 | -8.3  | -8.2  | -6.9 | -6.2 | -4.2 | test  | train | train | train | train | train | val   |
| 112 | CHEMBL203708  | low      | nh | nhm | a | -7.2 | -7.2  | -7.1  | -7.0 | -7.6 | -6.1 | -8.9  | -7.7  | -7.0 | -8.2  | -7.5  | -7.3 | -8.0  | -8.2  | -6.6 | -6.7 | -4.7 | val   | test  | train | train | train | train | train |
| 113 | CHEMBL101817  | low      | nh | nhm | a | -8.1 | -8.4  | -9.3  | -5.9 | -9.3 | -7.4 | -10.0 | -9.9  | -8.1 | -10.5 | -9.5  | -8.9 | -9.3  | -8.3  | -8.2 | -7.8 | -5.3 | train | val   | test  | train | train | train | train |
| 114 | CHEMBL82817   | low      | nh | nhm | a | -6.5 | -6.7  | -6.9  | -5.7 | -7.4 | -5.8 | -7.6  | -7.5  | -6.5 | -7.8  | -7.4  | -6.5 | -7.2  | -7.4  | -6.6 | -5.7 | -4.5 | train | train | val   | test  | train | train | train |
| 115 | CHEMBL348305  | low      | nh | nhm | a | -7.7 | -7.0  | -8.2  | -9.0 | -7.5 | -6.3 | -8.5  | -7.5  | -6.9 | -8.0  | -7.6  | -8.1 | -7.9  | -8.4  | -7.1 | -7.0 | -5.4 | train | train | train | val   | test  | train | train |
| 116 | CHEMBL3246237 | low      | nh | nhm | a | -7.8 | -7.7  | -7.9  | -6.7 | -8.1 | -6.3 | -9.2  | -8.0  | -7.3 | -8.9  | -7.8  | -8.1 | -8.3  | -8.7  | -7.1 | -7.2 | -4.3 | train | train | train | train | val   | test  | train |
| 117 | CHEMBL383680  | low      | nh | nhm | a | -8.4 | -7.6  | -8.1  | -6.9 | -7.7 | -6.6 | -9.0  | -7.9  | -7.0 | -8.5  | -8.1  | -8.4 | -8.8  | -8.3  | -7.0 | -7.1 | -3.9 | train | train | train | train | train | val   | test  |
| 118 | CHEMBL440575  | low      | nh | nhm | a | -7.5 | -7.2  | -7.8  | -5.5 | -7.5 | -6.4 | -8.8  | -7.9  | -6.7 | -8.1  | -7.9  | -7.7 | -8.1  | -8.4  | -7.0 | -6.6 | -4.2 | test  | train | train | train | train | train | val   |
| 119 |               |          |    |     |   |      |       |       |      |      |      |       |       |      |       |       |      |       |       |      |      |      |       |       |       |       |       |       |       |

|     |               |        |    |     |   |      |      |      |      |      |      |        |       |      |       |       |      |       |       |      |      |      |       |       |       |       |       |       |      |
|-----|---------------|--------|----|-----|---|------|------|------|------|------|------|--------|-------|------|-------|-------|------|-------|-------|------|------|------|-------|-------|-------|-------|-------|-------|------|
| 131 | CHEMBL206705  | low    | nh | nhm | a | -8.1 | -7.5 | -8.4 | -5.7 | -8.5 | -6.8 | -9.1   | -7.8  | -6.8 | -9.1  | -7.6  | -7.7 | -8.8  | -8.8  | -7.3 | -7.1 | -4.6 | train | train | train | train | train | val   | test |
| 132 | CHEMBL380524  | low    | nh | nhm | a | -8.1 | -7.3 | -8.2 | -6.5 | -7.4 | -6.5 | -9.0   | -7.4  | -6.8 | -8.6  | -7.5  | -8.0 | -8.7  | -7.9  | -6.9 | -6.6 | -4.2 | test  | train | train | train | train | train | val  |
| 133 | CHEMBL203833  | low    | nh | nhm | a | -7.8 | -7.0 | -8.3 | -7.4 | -8.3 | -6.5 | -9.3   | -8.1  | -6.7 | -8.4  | -7.6  | -8.1 | -8.4  | -8.5  | -7.1 | -6.6 | -4.6 | val   | test  | train | train | train | train |      |
| 134 | CHEMBL155571  | low    | nh | nhm | a | -7.8 | -7.8 | -8.4 | -7.7 | -8.0 | -6.8 | -8.9   | -7.9  | -6.8 | -8.4  | -8.0  | -8.8 | -8.4  | -9.0  | -7.5 | -7.3 | -5.8 | train | val   | test  | train | train | train |      |
| 135 | CHEMBL204553  | low    | nh | nhm | a | -8.2 | -6.8 | -7.8 | -5.2 | -7.4 | -6.1 | -7.9   | -7.7  | -6.5 | -8.6  | -7.8  | -7.6 | -8.4  | -8.5  | -7.0 | -6.4 | -4.0 | train | train | val   | test  | train | train |      |
| 136 | CHEMBL85348   | low    | nh | nhm | a | -6.4 | -7.4 | -6.9 | -6.9 | -7.2 | -6.1 | -7.6   | -7.4  | -6.2 | -8.3  | -7.4  | -7.0 | -8.4  | -8.2  | -6.7 | -6.0 | -4.8 | train | train | train | val   | test  | train |      |
| 137 | CHEMBL206037  | low    | nh | nhm | a | -8.1 | -7.1 | -7.6 | -5.3 | -7.8 | -6.2 | -8.7   | -7.6  | -7.0 | -8.1  | -7.9  | -7.6 | -8.1  | -7.8  | -6.8 | -6.4 | -4.1 | train | train | train | train | val   | test  |      |
| 138 | CHEMBL156241  | low    | nh | nhm | a | -8.1 | -7.3 | -8.8 | -9.1 | -8.8 | -7.0 | -9.2   | -8.4  | -7.3 | -9.2  | -8.7  | -9.1 | -8.9  | -9.5  | -7.6 | -7.7 | -6.1 | train | train | train | train | train | val   |      |
| 139 | CHEMBL204205  | low    | nh | nhm | a | -7.9 | -6.8 | -7.8 | -5.5 | -8.0 | -6.1 | -8.5   | -7.7  | -6.3 | -8.4  | -7.5  | -7.5 | -8.8  | -8.4  | -6.8 | -6.7 | -4.2 | test  | train | train | train | train | val   |      |
| 140 | CHEMBL315852  | low    | nh | nhm | a | -6.1 | -6.1 | -6.9 | -6.2 | -7.0 | -5.5 | -7.3   | -7.0  | -6.2 | -7.4  | -7.1  | -7.0 | -7.6  | -7.7  | -5.9 | -5.3 | -4.2 | val   | test  | train | train | train | train |      |
| 141 | CHEMBL203217  | low    | nh | nhm | a | -7.4 | -7.1 | -7.5 | -5.2 | -7.7 | -6.4 | -7.5   | -7.7  | -6.8 | -8.0  | -7.8  | -7.3 | -8.2  | -7.7  | -6.2 | -6.1 | -4.2 | train | val   | test  | train | train | train |      |
| 142 | CHEMBL206338  | low    | nh | nhm | a | -7.6 | -7.2 | -7.8 | -6.3 | -7.4 | -6.1 | -9.2   | -7.9  | -6.7 | -8.5  | -8.0  | -7.8 | -8.7  | -9.0  | -6.9 | -6.8 | -3.9 | train | train | val   | test  | train | train |      |
| 143 | CHEMBL381174  | low    | nh | nhm | a | -7.9 | -7.3 | -8.1 | -5.8 | -7.9 | -6.5 | -8.7   | -7.7  | -6.7 | -8.6  | -7.9  | -7.8 | -8.6  | -8.4  | -7.0 | -6.5 | -4.4 | train | train | train | val   | test  | train |      |
| 144 | CHEMBL315703  | low    | nh | nhm | a | -7.1 | -7.3 | -7.0 | -6.5 | -7.3 | -6.4 | -7.7   | -7.4  | -6.4 | -8.0  | -7.6  | -7.5 | -8.0  | -7.8  | -6.7 | -5.9 | -4.5 | train | train | train | train | val   | test  |      |
| 145 | CHEMBL382485  | low    | nh | nhm | a | -7.6 | -7.0 | -7.8 | -6.4 | -7.2 | -6.3 | -8.6   | -7.3  | -6.7 | -8.2  | -7.9  | -7.6 | -8.4  | -7.8  | -6.6 | -6.3 | -4.0 | train | train | train | train | train | val   |      |
| 146 | CHEMBL203572  | low    | nh | nhm | a | -7.7 | -7.1 | -7.7 | -5.3 | -7.4 | -6.4 | -8.6   | -7.7  | -6.8 | -8.4  | -7.6  | -7.7 | -8.4  | -8.0  | -6.7 | -6.4 | -4.2 | test  | train | train | train | train | val   |      |
| 147 | CHEMBL204307  | low    | nh | nhm | a | -7.8 | -8.1 | -8.4 | -6.0 | -8.5 | -6.7 | -8.2   | -8.5  | -7.3 | -9.3  | -8.1  | -8.2 | -8.6  | -7.8  | -7.5 | -7.1 | -4.8 | val   | test  | train | train | train | train |      |
| 148 | CHEMBL381072  | low    | nh | nhm | a | -7.0 | -6.5 | -6.8 | -6.1 | -7.3 | -5.4 | -7.8   | -6.8  | -6.1 | -7.4  | -7.0  | -7.2 | -7.7  | -7.9  | -6.1 | -6.0 | -3.5 | train | val   | test  | train | train | train |      |
| 149 | CHEMBL381915  | low    | nh | nhm | a | -7.8 | -7.4 | -8.2 | -5.5 | -7.7 | -6.5 | -9.0   | -7.6  | -6.8 | -8.8  | -7.7  | -7.0 | -8.5  | -7.8  | -7.0 | -6.5 | -3.8 | train | train | val   | test  | train | train |      |
| 150 | CHEMBL204855  | low    | nh | nhm | a | -7.4 | -7.1 | -7.7 | -7.2 | -7.5 | -6.2 | -9.1   | -8.1  | -6.8 | -8.5  | -8.1  | -7.5 | -8.4  | -7.8  | -6.7 | -6.7 | -4.7 | train | train | train | val   | test  | train |      |
| 151 | CHEMBL431022  | low    | nh | nhm | a | -7.0 | -6.9 | -7.0 | -6.6 | -7.2 | -6.2 | -7.5   | -7.4  | -6.2 | -7.8  | -7.3  | -7.3 | -8.1  | -7.9  | -6.3 | -6.1 | -4.3 | train | train | train | train | val   | test  |      |
| 152 | CHEMBL4080811 | low    | nh | nhm | a | -8.0 | -9.7 | -9.6 | -6.6 | -9.2 | -8.3 | -10.3  | -10.0 | -8.7 | -10.0 | -9.7  | -9.3 | -11.1 | -11.3 | -8.1 | -8.8 | -5.4 | train | train | train | train | train | val   |      |
| 153 | CHEMBL4088680 | low    | nh | nhm | a | -7.8 | -9.7 | -9.7 | -6.8 | -9.7 | -7.9 | -10.0  | -9.8  | -9.7 | -10.3 | -10.5 | -9.9 | -10.4 | -10.9 | -8.4 | -7.9 | -5.6 | test  | train | train | train | train | val   |      |
| 154 | CHEMBL4095476 | low    | nh | nhm | a | -7.4 | -9.3 | -9.2 | -6.7 | -9.1 | -8.5 | -8.7   | -8.6  | -8.3 | -10.3 | -9.4  | -7.3 | -9.1  | -8.2  | -8.2 | -7.5 | -4.1 | val   | test  | train | train | train | train |      |
| 155 | CHEMBL85707   | low    | nh | nhm | a | -7.2 | -7.5 | -8.4 | -5.7 | -8.0 | -6.8 | -8.4   | -8.1  | -7.2 | -8.9  | -8.3  | -8.0 | -8.3  | -7.8  | -6.9 | -6.8 | -4.7 | train | val   | test  | train | train | train |      |
| 156 | CHEMBL382483  | low    | nh | nhm | a | -7.4 | -7.3 | -8.1 | -6.2 | -7.7 | -6.4 | -8.8   | -7.6  | -7.1 | -8.5  | -8.2  | -8.0 | -8.7  | -7.9  | -6.7 | -6.5 | -4.1 | train | train | val   | test  | train | train |      |
| 157 | CHEMBL3246756 | low    | nh | nhm | a | -7.3 | -8.7 | -8.3 | -6.9 | -8.9 | -7.1 | -10.2  | -8.9  | -7.6 | -9.5  | -9.1  | -9.5 | -9.4  | -9.1  | -7.6 | -7.1 | -5.1 | train | train | train | val   | test  | train |      |
| 158 | CHEMBL3277541 | low    | nh | nhm | a | -8.1 | -8.1 | -8.3 | -5.9 | -8.3 | -7.5 | -9.1   | -8.4  | -7.7 | -9.0  | -8.6  | -8.8 | -9.3  | -10.0 | -7.1 | -7.4 | -4.3 | train | train | train | train | val   | test  |      |
| 159 | CHEMBL1949977 | low    | nh | nhm | a | -7.7 | -8.7 | -9.7 | -7.0 | -9.8 | -7.9 | -11.0  | -10.3 | -9.6 | -11.1 | -9.6  | -7.3 | -8.7  | -7.6  | -8.4 | -8.8 | -4.7 | train | train | train | train | train | val   |      |
| 160 | CHEMBL449929  | low    | nh | nhm | a | -7.8 | -7.4 | -8.0 | -6.2 | -8.1 | -6.7 | -8.5   | -7.5  | -7.0 | -8.6  | -8.6  | -7.5 | -8.2  | -7.4  | -7.5 | -7.0 | -4.7 | test  | train | train | train | train | val   |      |
| 161 | CHEMBL3360996 | low    | nh | nhm | a | -7.8 | -8.3 | -9.2 | -6.3 | -8.7 | -7.3 | -9.3   | -9.2  | -8.2 | -9.6  | -9.4  | -7.9 | -8.0  | -7.0  | -7.5 | -7.6 | -4.7 | val   | test  | train | train | train | train |      |
| 162 | CHEMBL3763633 | active | nh | nhm | a | -7.8 | -7.3 | -8.4 | -5.8 | -8.3 | -6.7 | -8.5   | -8.4  | -7.3 | -9.2  | -8.2  | -7.9 | -8.2  | -8.3  | -7.0 | -7.2 | -4.6 | train | val   | test  | train | train | train |      |
| 163 | CHEMBL66654   | active | nh | nhm | a | -7.8 | -6.9 | -7.5 | -7.3 | -7.2 | -5.8 | -8.4   | -7.2  | -6.4 | -8.5  | -7.2  | -8.0 | -7.8  | -8.5  | -7.0 | -7.2 | -4.4 | train | train | val   | test  | train | train |      |
| 164 | CHEMBL2181582 | active | nh | nhm | a | -9.0 | -8.9 | -9.1 | -6.8 | -9.3 | -8.1 | -10.0  | -9.7  | -7.8 | -10.2 | -9.3  | -8.8 | -9.2  | -10.1 | -8.1 | -7.5 | -5.8 | train | train | train | val   | test  | train |      |
| 165 | CHEMBL3356152 | active | nh | nhm | a | -6.9 | -7.2 | -8.0 | -6.0 | -7.9 | -6.7 | -8.1   | -8.1  | -6.5 | -8.5  | -8.3  | -8.0 | -7.8  | -8.1  | -6.7 | -6.5 | -4.3 | train | train | train | train | val   | test  |      |
| 166 | CHEMBL1828889 | active | nh | nhm | a | -7.4 | -7.7 | -7.4 | -5.2 | -7.6 | -6.5 | -8.9   | -7.6  | -6.7 | -8.3  | -7.9  | -8.0 | -8.3  | -8.3  | -6.4 | -6.3 | -4.1 | train | train | train | train | train | val   |      |
| 167 | CHEMBL3356151 | active | nh | nhm | a | -7.4 | -7.3 | -7.9 | -7.4 | -8.2 | -6.6 | -8.2   | -7.9  | -7.3 | -7.9  | -7.6  | -8.1 | -8.1  | -8.2  | -6.6 | -6.4 | -4.6 | test  | train | train | train | train | val   |      |
| 168 | CHEMBL3764390 | active | nh | nhm | a | -7.8 | -8.0 | -8.5 | -6.3 | -8.7 | -7.0 | -8.7   | -8.6  | -7.8 | -9.7  | -8.5  | -8.6 | -8.1  | -8.6  | -7.3 | -7.3 | -4.7 | val   | test  | train | train | train | train |      |
| 169 | CHEMBL3356148 | active | nh | nhm | a | -6.8 | -7.0 | -7.8 | -5.9 | -8.2 | -6.5 | -8.1   | -7.7  | -6.7 | -8.0  | -7.9  | -7.9 | -8.1  | -8.2  | -6.8 | -6.5 | -4.0 | train | val   | test  | train | train | train |      |
| 170 | CHEMBL256339  | active | nh | nhm | a | -6.5 | -6.1 | -7.0 | -5.9 | -7.0 | -5.7 | -7.4   | -6.7  | -5.8 | -7.1  | -6.2  | -6.8 | -7.0  | -7.5  | -6.3 | -5.7 | -4.5 | train | train | val   | test  | train | train |      |
| 171 | CHEMBL3246238 | active | nh | nhm | a | -7.0 | -7.5 | -7.6 | -7.6 | -7.9 | -6.1 | -9.2   | -7.8  | -7.3 | -8.7  | -7.9  | -7.9 | -8.6  | -8.3  | -7.0 | -7.0 | -4.4 | train | train | train | val   | test  | train |      |
| 172 | CHEMBL45      | active | nh | nhm | a | -7.4 | -6.6 | -7.7 | -8.0 | -7.5 | -6.0 | -8.3   | -7.4  | -6.3 | -7.4  | -7.2  | -8.0 | -7.3  | -7.8  | -6.3 | -6.1 | -5.9 | train | train | train | train | val   | test  |      |
| 173 | CHEMBL539698  | active | nh | nhm | a | -7.8 | -7.8 | -8.2 | -5.8 | -8.1 | -7.2 | -8.6   | -8.6  | -7.3 | -8.9  | -8.2  | -7.0 | -8.2  | -8.3  | -6.7 | -6.5 | -5.0 | train | train | train | train | train | val   |      |
| 174 | CHEMBL1087164 | active | nh | nhm | a | -8.1 | -7.3 | -8.4 | -5.6 | -9.6 | -6.6 | -7.9   | -7.7  | -7.7 | -9.3  | -8.5  | -6.9 | -6.5  | -7.0  | -6.7 | -7.4 | -4.4 | test  | train | train | train | train | val   |      |
| 175 | CHEMBL235327  | active | nh | nhm | a | -7.4 | -7.6 | -7.7 | -8.2 | -7.6 | -6.6 | -8.4   | -7.4  | -6.5 | -9.0  | -7.8  | -7.9 | -8.8  | -8.7  | -6.6 | -6.4 | -3.9 | val   | test  | train | train | train | train |      |
| 176 | CHEMBL391604  | active | nh | nhm | a | -6.4 | -6.4 | -7.0 | -5.2 | -6.2 | -5.8 | -7.5   | -6.7  | -6.0 | -7.3  | -6.8  | -7.4 | -7.1  | -6.7  | -6.5 | -5.1 | -3.7 | train | val   | test  | train | train | train |      |
| 177 | CHEMBL390950  | active | nh | nhm | a | -7.3 | -7.5 | -7.8 | -7.2 | -8.1 | -6.5 | -8.1   | -8.2  | -6.9 | -8.6  | -7.9  | -7.4 | -8.0  | -8.4  | -6.4 | -6.8 | -4.9 | train | train | val   | test  | train | train |      |
| 178 | CHEMBL3600401 | active | nh | nhm | a | -7.8 | -7.9 | -8.6 | -5.8 | -8.0 | -6.7 | -8.8   | -8.6  | -7.7 | -8.7  | -8.4  | -7.5 | -8.1  | -7.6  | -7.9 | -7.2 | 2.3  | train | train | train | val   | test  | train |      |
| 179 | CHEMBL206296  | active | nh | nhm | a | -7.4 | -6.9 | -7.7 | -7.6 | -7.6 | -6.2 | -8.0   | -7.5  | -6.7 | -7.9  | -7.6  | -7.8 | -7.6  | -8.1  | -6.4 | -6.2 | -4.5 | train | train | train | train | val   | test  |      |
| 180 | CHEMBL2179195 | active | nh | nhm | a | -5.6 | -7.1 | -6.9 | -4.7 | -7.9 | -6.0 | -7.2   | -7.9  | -7.1 | -8.8  | -7.5  | -6.1 | -5.0  | -5.8  | -6.4 | -6.1 | 7.0  | train | train | train | train | train | val   |      |
| 181 | CHEMBL4208744 | active | nh | nhm | a | -8.4 | -8.4 | -8.6 | -6.3 | -8.6 | -8.5 | -8.8   | -9.1  | -7.5 | -9.4  | -8.1  | -8.0 | -8.2  | -8.5  | -7.1 | -7.1 | -4.8 | test  | train | train | train | train | val   |      |
| 182 | CHEMBL127135  | active | nh | nhm | a | -8.8 | -8.1 | -9.5 | -7.9 | -9.1 | -7.2 | -9.9   | -9.1  | -7.8 | -9.7  | -8.2  | -9.1 | -9.7  | -9.5  | -8.0 | -7.6 | -5.5 | val   | test  | train | train | train | train |      |
| 183 | CHEMBL2440659 | active | nh | nhm | a | -7.7 | -8.1 | -8.6 | -6.5 | -7.9 | -6.9 | -9.1   | -8.4  | -7.8 | -8.8  | -7.8  | -8.8 | -7.9  | -8.9  | -7.3 | -7.1 | -4.6 | train | val   | test  | train | train | train |      |
| 184 | CHEMBL1275998 | active | nh | nhm | a | -7.7 | -7.4 | -7.9 | -7.3 | -8.8 | -6.1 | -8.8   | -7.8  | -7.4 | -8.3  | -7.9  | -8.0 | -8.5  | -9.3  | -6.5 | -6.6 | -4.4 | train | train | val   | test  | train | train |      |
| 185 | CHEMBL3356150 | active | nh | nhm | a | -7.3 | -7.2 | -7.8 | -6.3 | -8.2 | -6.6 | -8.1   | -7.8  | -6.9 | -8.2  | -7.6  | -8.2 | -8.2  | -8.1  | -6.6 | -6.4 | -4.3 | train | train | train | val   | test  | train |      |
| 186 | CHEMBL239800  | active | nh | nhm | a | -7.4 | -7.2 | -7.6 | -6.9 | -7.3 | -6.4 | -8.9</ |       |      |       |       |      |       |       |      |      |      |       |       |       |       |       |       |      |

|     |               |          |    |     |    |      |      |       |      |      |      |       |      |      |       |      |       |       |       |      |      |      |       |       |       |       |       |       |       |
|-----|---------------|----------|----|-----|----|------|------|-------|------|------|------|-------|------|------|-------|------|-------|-------|-------|------|------|------|-------|-------|-------|-------|-------|-------|-------|
| 197 | CHEMBL434     | inactive | nh | nhm | na | -6.8 | -5.9 | -6.9  | -7.7 | -6.5 | -5.5 | -7.2  | -6.2 | -5.6 | -6.9  | -6.3 | -7.0  | -6.7  | -7.0  | -6.2 | -5.4 | -5.3 | train | val   | test  | train | train | train | train |
| 198 | CHEMBL347242  | inactive | nh | nhm | na | -8.6 | -8.5 | -9.8  | -7.8 | -9.1 | -7.0 | -10.2 | -9.4 | -8.0 | -10.3 | -9.1 | -9.9  | -10.4 | -10.2 | -8.3 | -8.4 | -5.1 | train | train | val   | test  | train | train | train |
| 199 | CHEMBL156434  | inactive | nh | nhm | na | -8.9 | -8.4 | -10.0 | -9.7 | -9.5 | -7.4 | -10.1 | -9.8 | -8.1 | -10.1 | -8.9 | -10.2 | -10.2 | -10.3 | -8.1 | -8.4 | -5.7 | train | train | train | val   | test  | train | train |
| 200 | CHEMBL421154  | inactive | nh | nhm | na | -6.2 | -7.0 | -7.2  | -5.2 | -7.3 | -5.8 | -8.1  | -7.2 | -6.6 | -8.2  | -7.4 | -7.3  | -8.0  | -8.0  | -6.6 | -5.9 | -4.6 | train | train | train | train | val   | test  | train |
| 201 | CHEMBL312907  | inactive | nh | nhm | na | -6.7 | -6.7 | -6.9  | -7.0 | -6.8 | -5.9 | -7.5  | -7.2 | -6.1 | -7.4  | -7.2 | -6.9  | -7.8  | -7.7  | -6.1 | -5.7 | -5.7 | train | train | train | train | train | val   | test  |
| 202 | CHEMBL155168  | inactive | nh | nhm | na | -7.6 | -7.1 | -8.2  | -9.0 | -8.0 | -6.5 | -8.9  | -7.8 | -6.8 | -8.5  | -7.8 | -8.4  | -8.4  | -8.6  | -7.2 | -7.2 | -5.6 | test  | train | train | train | train | train | val   |
| 203 | CHEMBL153858  | inactive | nh | nhm | na | -8.1 | -7.2 | -8.6  | -8.0 | -7.7 | -6.4 | -8.6  | -7.9 | -6.7 | -8.4  | -7.8 | -8.8  | -8.5  | -8.8  | -7.2 | -7.4 | -4.7 | val   | test  | train | train | train | train | train |
| 204 | CHEMBL87530   | inactive | nh | nhm | na | -6.4 | -6.0 | -6.7  | -7.1 | -6.8 | -5.4 | -7.4  | -6.7 | -5.9 | -7.2  | -6.8 | -7.3  | -6.9  | -7.3  | -6.0 | -5.4 | -4.0 | train | val   | test  | train | train | train | train |
| 205 | CHEMBL87683   | inactive | nh | nhm | na | -6.7 | -6.2 | -7.0  | -7.4 | -7.2 | -5.5 | -7.4  | -6.7 | -6.2 | -6.9  | -6.5 | -7.3  | -7.0  | -7.0  | -5.9 | -5.9 | -5.7 | train | train | val   | test  | train | train | train |
| 206 | CHEMBL315700  | inactive | nh | nhm | na | -5.8 | -6.1 | -6.6  | -6.4 | -6.7 | -5.4 | -7.4  | -6.8 | -6.1 | -7.1  | -7.0 | -6.6  | -6.9  | -7.2  | -6.0 | -5.3 | -3.8 | train | train | train | val   | test  | train | train |
| 207 | CHEMBL155837  | inactive | nh | nhm | na | -7.6 | -7.2 | -8.3  | -9.1 | -8.0 | -6.6 | -8.9  | -8.0 | -6.8 | -8.6  | -8.0 | -8.5  | -8.5  | -8.8  | -7.2 | -7.3 | -6.1 | train | train | train | train | val   | test  | train |
| 208 | CHEMBL155598  | inactive | nh | nhm | na | -7.7 | -8.1 | -9.4  | -6.5 | -8.3 | -7.1 | -9.7  | -8.7 | -7.2 | -9.2  | -8.8 | -9.5  | -9.5  | -9.5  | -8.2 | -7.4 | -6.5 | train | train | train | train | train | val   | test  |
| 209 | CHEMBL85854   | inactive | nh | nhm | na | -5.6 | -6.3 | -6.2  | -5.6 | -7.1 | -5.4 | -6.4  | -6.9 | -6.3 | -6.9  | -7.0 | -6.0  | -6.9  | -7.2  | -5.5 | -5.5 | -3.4 | test  | train | train | train | train | train | val   |
| 210 | CHEMBL557688  | inactive | nh | nhm | na | -8.4 | -8.3 | -8.6  | -6.1 | -8.5 | -7.5 | -9.0  | -8.9 | -7.5 | -9.2  | -8.5 | -7.6  | -8.4  | -9.2  | -7.2 | -6.9 | -5.2 | val   | test  | train | train | train | train | train |
| 211 | CHEMBL87409   | inactive | nh | nhm | na | -6.5 | -6.4 | -7.4  | -8.0 | -7.1 | -5.7 | -7.5  | -7.3 | -6.8 | -7.3  | -7.2 | -7.7  | -7.5  | -7.5  | -6.4 | -5.9 | -5.2 | train | val   | test  | train | train | train | train |
| 212 | CHEMBL348532  | inactive | nh | nhm | na | -7.9 | -7.2 | -8.3  | -7.1 | -7.8 | -6.6 | -8.8  | -7.9 | -6.7 | -8.4  | -8.2 | -8.9  | -8.4  | -9.4  | -7.3 | -7.2 | -4.7 | train | train | val   | test  | train | train | train |
| 213 | CHEMBL2348441 | inactive | nh | nhm | na | -8.6 | -7.9 | -8.9  | -6.2 | -8.6 | -7.8 | -9.2  | -9.2 | -7.7 | -9.5  | -8.7 | -7.4  | -8.2  | -9.2  | -7.5 | -7.0 | -5.3 | train | train | train | val   | test  | train | train |
| 214 | CHEMBL2348446 | inactive | nh | nhm | na | -8.4 | -8.2 | -8.6  | -6.4 | -8.9 | -7.7 | -9.5  | -9.0 | -7.5 | -9.3  | -8.7 | -8.7  | -8.7  | -9.5  | -7.6 | -7.0 | -5.3 | train | train | train | train | val   | test  | train |
| 215 | CHEMBL1928323 | inactive | nh | nhm | na | -6.6 | -6.6 | -6.9  | -7.7 | -6.8 | -5.5 | -8.3  | -6.9 | -6.1 | -7.2  | -7.0 | -7.2  | -7.4  | -7.4  | -5.9 | -6.2 | -3.9 | train | train | train | train | train | val   | test  |
| 216 | CHEMBL4084733 | inactive | nh | nhm | na | -9.4 | -8.0 | -9.6  | -6.1 | -9.2 | -7.5 | -10.1 | -9.0 | -7.6 | -10.2 | -8.6 | -8.7  | -10.0 | -9.1  | -8.2 | -8.0 | -4.9 | test  | train | train | train | train | train | val   |
