# Supplementary material for: Consensus Ensemble Multitarget Neural Network Model of Anxiolytic Activity of Chemical Compounds and Its Use for Multitarget Pharmacophore Design
Source: MDPI journal article supplement (doi:10.3390/ph16050731), 2023-05-11
Supplement: s1 [file s1]

**Table S5.** Valid 3D models of biotargets relevant to the anxiolytic activity of chemotypes of nitrogen-containing heterocycles.

| Target               | Name                                         | 3D Model Code         |
|----------------------|----------------------------------------------|-----------------------|
| GABRA1/GABRB2/GABRG2 | GABA-A receptor alpha1-beta2-gamma2          | 6D6T                  |
| GRIN1/GRIN2A/GRIN2B  | NMDA receptor GluN1/GluN2A/GluN2B            | 5UOW                  |
| HTR1A                | 5-hydroxytryptamine receptor 1A              | 7E2Y                  |
| HTR7                 | 5-hydroxytryptamine receptor 7               | AF-P34969-F1-model_v1 |
| HTR4                 | 5-hydroxytryptamine receptor 4               | AF-Q13639-F1-model_v1 |
| HTR2A                | 5-hydroxytryptamine receptor 2A              | 6A93                  |
| SLC18A2              | Synaptic vesicular amine transporter (VMAT2) | AF-Q05940-F1-model_v1 |
| AGTR1                | Type-1 angiotensin II receptor               | 4YAY                  |
| ADRA1A               | Alpha-1A adrenergic receptor                 | AF-P35348-F1-model_v1 |
| ADRA1B               | Alpha-1B adrenergic receptor                 | AF-P35368-F1-model_v1 |
| ADRA2A               | Alpha-2A adrenergic receptor                 | 6KUX                  |
| ADRA2B               | Alpha-2B adrenergic receptor                 | 6K41                  |
| MTNR1A               | Melatonin receptor type 1A (MT1)             | 6ME3                  |
| MTNR1B               | Melatonin receptor type 1B (MT2)             | 6ME6                  |
