# Supplementary material for: Consensus Ensemble Multitarget Neural Network Model of Anxiolytic Activity of Chemical Compounds and Its Use for Multitarget Pharmacophore Design
Source: MDPI journal article supplement (doi:10.3390/ph16050731), 2023-05-11
Supplement: s1 [file s1]

**Table S6.** The key amino acids of binding sites of valid 3D models of biotargets relevant to the anxiolytic activity of chemotypes of nitrogen-containing heterocycles.

| Target                                         | 3D Model Code         | Key amino acids                                                                                                                                                                                                                                |
|------------------------------------------------|-----------------------|------------------------------------------------------------------------------------------------------------------------------------------------------------------------------------------------------------------------------------------------|
| GABRA1/GABRB2/GABRG2<br>GABA-binding           | 6D6T                  | Tyr97A, Glu155A, Tyr205A, Phe64B, Arg66B,<br>Thr129B, Arg131B                                                                                                                                                                                  |
| GABRA1/GABRB2/GABRG2<br>benzodiazepine-binding | 6D6T                  | Phe99D, His101D, Tyr159D, Phe77E, Met130E,<br>Thr142E                                                                                                                                                                                          |
| GRIN1/GRIN2A/GRIN2B<br>glutamate-binding       | 5UOW                  | His473, Thr501, Gly676, Ser677, Thr678, Asp719,<br>Glu1101                                                                                                                                                                                     |
| GRIN1/GRIN2A/GRIN2B<br>Ca-channel blocking     | 5UOW                  | Leu630, Ala631, Thr634, Leu636, Ala637, Thr640,<br>Thr646, Leu649                                                                                                                                                                              |
| HTR1A                                          | 7E2Y                  | Asp116, Cys120, Ser199, Phe361, Phe362, Tyr390                                                                                                                                                                                                 |
| HTR7                                           | AF-P34969-F1-model_v1 | Val134, Phe137, Val138, Thr141, Phe158, Ile159,<br>Ala160, Asp162, Val163, Trp340, Phe343, Phe344,<br>Ser347, Arg350, Trp364, Glu366, Arg367, Leu370,<br>Tyr374                                                                                |
| HTR4                                           | AF-Q13639-F1-model_v1 | Trp86, Arg96, Asp100, Thr104, Tyr192, Ala193,<br>Cys196, Ser197, Trp294                                                                                                                                                                        |
| HTR2A serotonin-binding                        | 6A93                  | Ala207, Tyr266, Val210, Val214, Leu211, Leu46,<br>Thr42                                                                                                                                                                                        |
| HTR2A allosteric                               | 6A93                  | Phe225, Val252, Trp222, Ile96, Phe218, Phe226                                                                                                                                                                                                  |
| SLC18A2                                        | AF-Q05940-F1-model_v1 | Asp33, Asp262, Glu312, Tyr341, Asp399, Asp426,<br>Asp460                                                                                                                                                                                       |
| AGTR1                                          | 4YAY                  | Tyr35, Trp84, Thr88, Ser105, Val108, Ser109,<br>Leu112, Ala163, Arg167, Phe182, Pro285, Ile288,<br>Tyr292                                                                                                                                      |
| ADRA1A                                         | AF-P35348-F1-model_v1 | Asn44, Asp72, Ser83, Phe86, Trp102, Asp106,<br>Val107, Cys110, Thr111, Ile157, Ser158, Pro161,<br>Gln167, Ile178, Tyr184, Ser188, Ala189, Ser192,<br>Phe193, Leu290, Phe288, Phe289, Phe308, Lys309,<br>Phe312, Tyr316, Asn322, Tyr326, Ser330 |
| ADRA1B                                         | AF-P35368-F1-model_v1 | Asn63, Asp91, Asp125, Thr130, Arg143, Ser207,<br>Arg288, Lys291, Thr295, Phe310, Asn344, Thr348,<br>Ser352                                                                                                                                     |
| ADRA2A                                         | 6KUX                  | Tyr109, Asp113, Val114, Cys188, Glu189, Ile190,<br>Phe390, Phe391, Phe408, Phe412, Tyr416                                                                                                                                                      |
| ADRA2B                                         | 6K41                  | Asp92, Val93, Cys96, Thr97, Leu166, Ser176,<br>Ser180, Trp384, Phe387, Phe388, Tyr391, Phe412,<br>Tyr 416                                                                                                                                      |
| MTNR1A                                         | 6ME3                  | Ala104, Met107, Gly108, Val111, Val159, Asn162,<br>Leu168, Thr178, Phe179, Gln181, Val191, Leu254,<br>Asn255, Tyr281, Ala284, Tyr285                                                                                                           |
| MTNR1B                                         | 6ME6                  | Ala117, Met120, Gly121, Val124, Asn175, Phe192,<br>Gln194, Tyr200, Val204, Val205, Leu267, Asn268,<br>Tyr294, Ala297, Tyr298                                                                                                                   |
