# Supplementary material for: Consensus Ensemble Multitarget Neural Network Model of Anxiolytic Activity of Chemical Compounds and Its Use for Multitarget Pharmacophore Design
Source: MDPI journal article supplement (doi:10.3390/ph16050731), 2023-05-11
Supplement: s1 [file s1]

**Table S8.** Structural formulas of compounds with high anxiolytic activity and key points of their interaction with significant biotargets.

**Record 1**

Structure

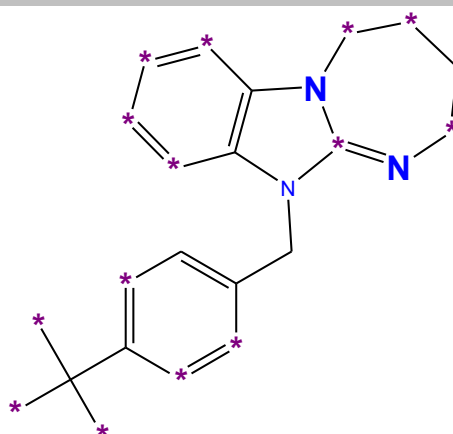

Code  
Target

DAB-0019  
ADRA1B

**Record 2**

Structure

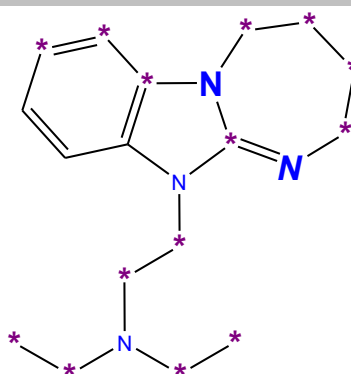

Code  
Target

DAB-0020  
ADRA1B

**Record 3**

Structure

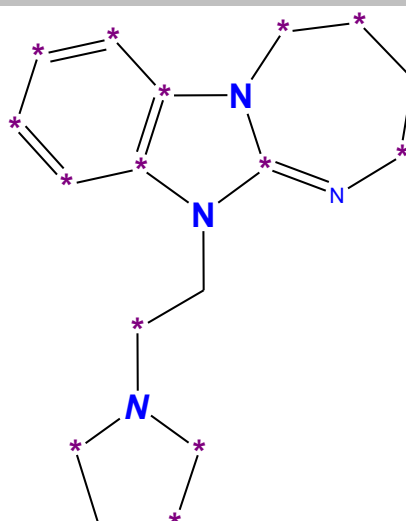

Code  
Target

DAB-0021  
ADRA1B

**Record 4**

Structure

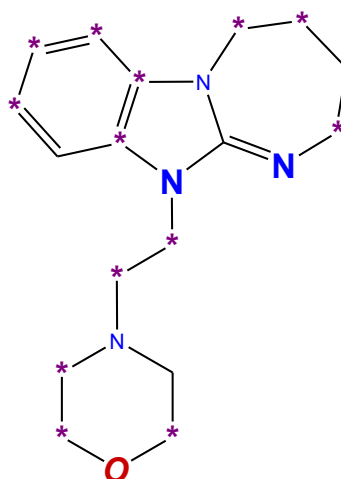

Code  
Target

DAB-0023  
ADRA1B

**Record 5**  
Structure

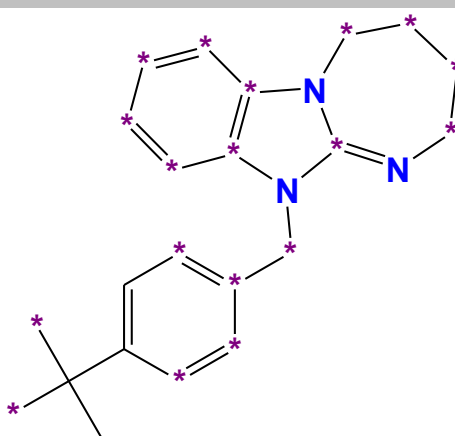

Code  
Target

DAB-0019  
ADRA2A

**Record 6**  
Structure

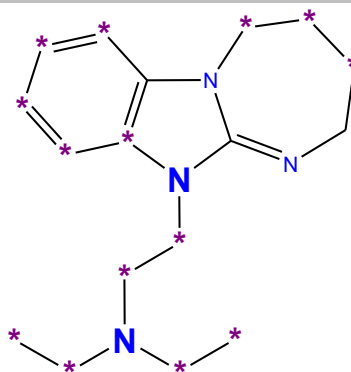

Code  
Target

DAB-0020  
ADRA2A

**Record 7**

Structure

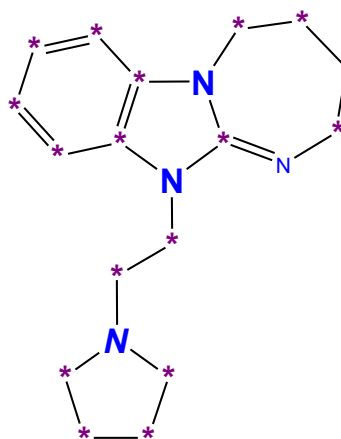

DAB-0021  
ADRA2A

Code  
Target  
**Record 8**  
Structure

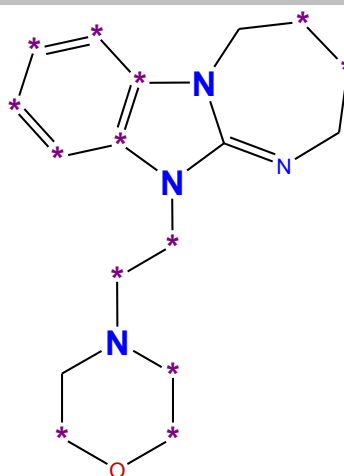

DAB-0023  
ADRA2A

Code  
Target  
**Record 9**  
Structure

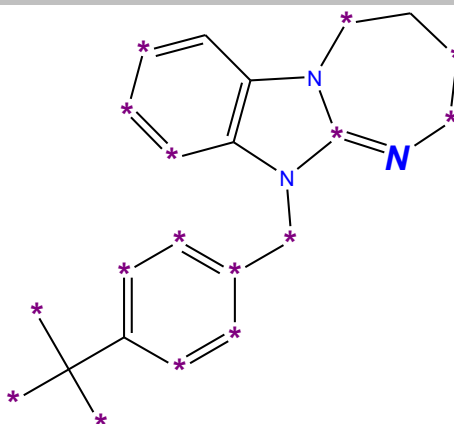

DAB-0019  
AGTR1

Code  
Target  
**Record 10**

Structure

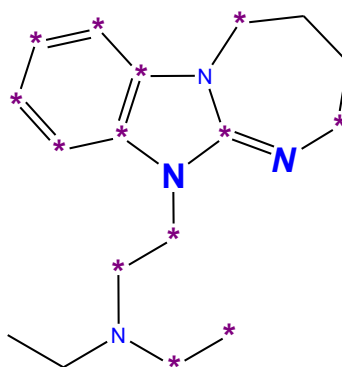

DAB-0020  
AGTR1

Code  
Target  
**Record 11**  
Structure

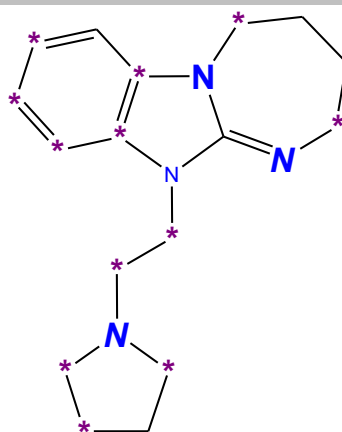

DAB-0021  
AGTR1

Code  
Target  
**Record 12**  
Structure

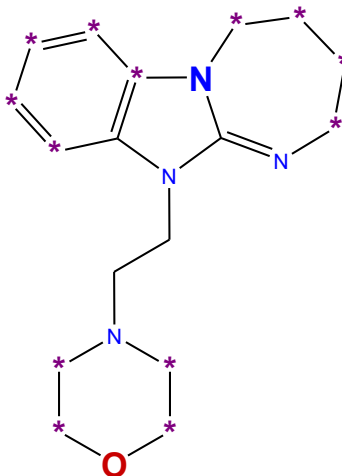

DAB-0023  
AGTR1

Code  
Target  
**Record 13**

Structure

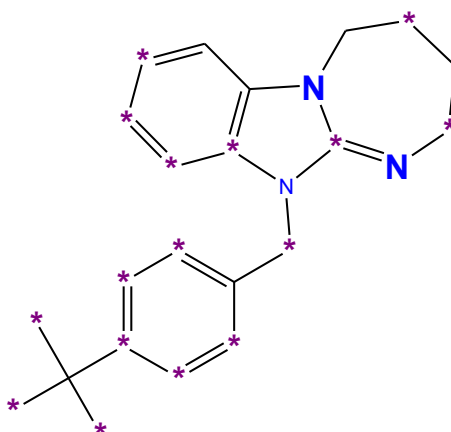

Code  
Target

DAB-0019  
NMDA-Glut

**Record 14**  
Structure

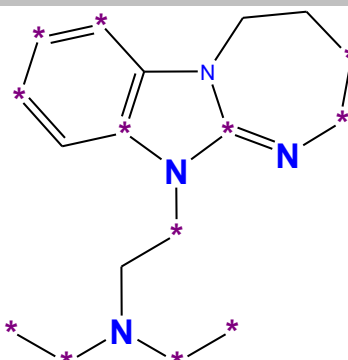

Code  
Target

DAB-0020  
NMDA-Glut

**Record 15**  
Structure

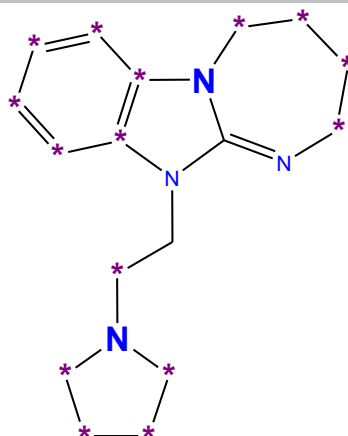

Code  
Target

DAB-0021  
NMDA-Glut

**Record 16**

Structure

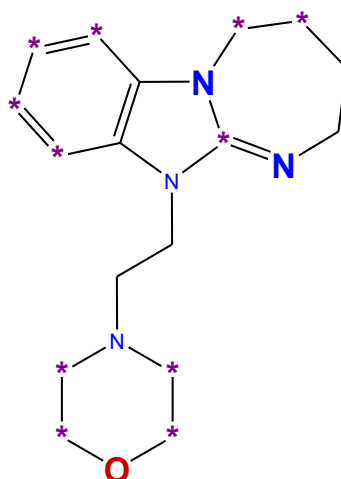

Code  
Target

DAB-0023  
NMDA-Glut

**Record 17**  
Structure

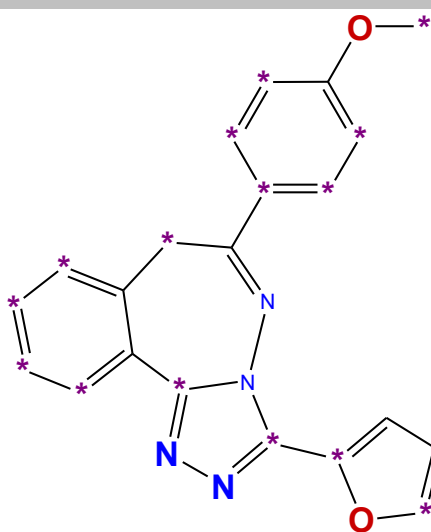

Code  
Target

RD-0004  
ADRA1B

**Record 18**  
Structure

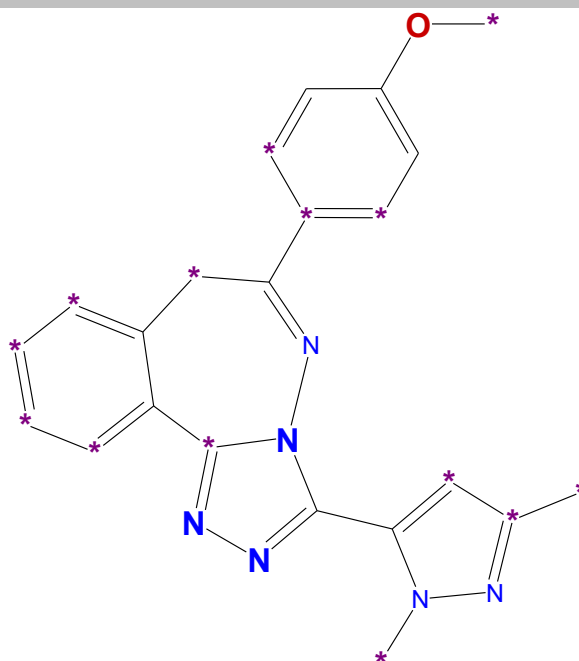

Code  
Target

RD-0012  
ADRA1B

**Record 19**  
Structure

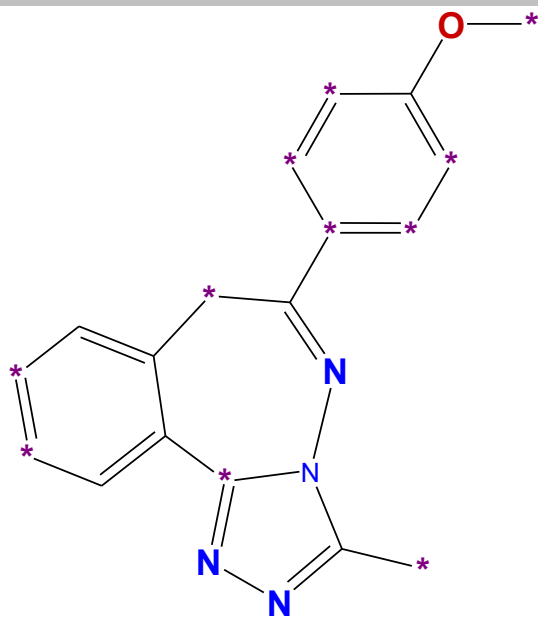

Code  
Target

RD-0013  
ADRA1B

**Record 20**  
Structure

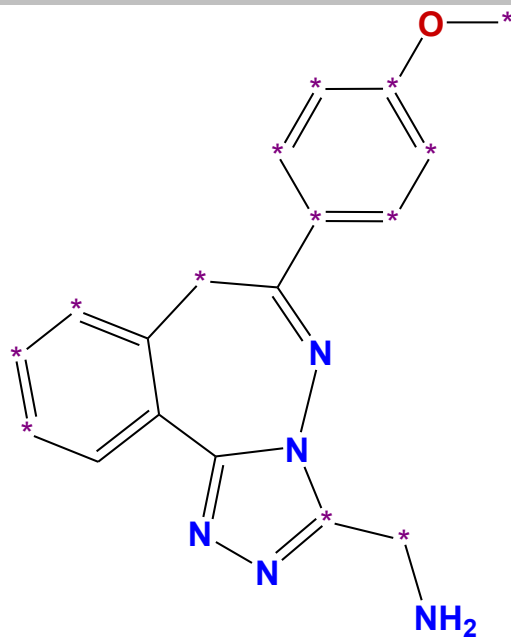

Code  
Target

RD-0014  
ADRA1B

**Record 21**

Structure

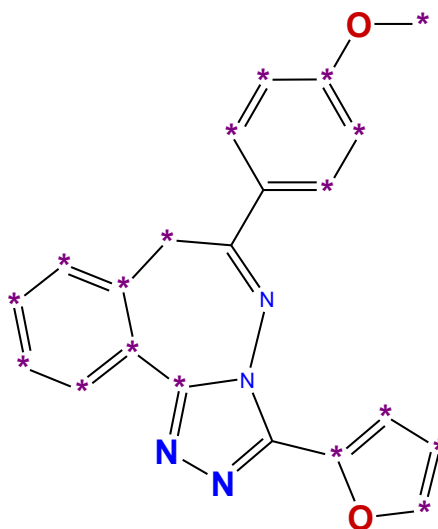

Code

RD-0004

Target

ADRA2A

**Record 22**

Structure

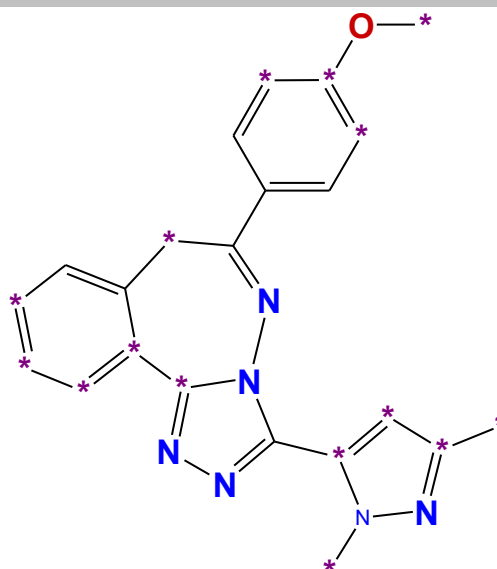

Code

RD-0012

Target

ADRA2A

**Record 23**

Structure

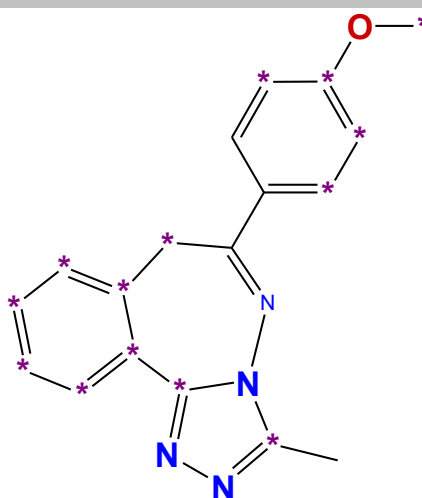

Code

RD-0013

Target

ADRA2A

**Record 24**



Structure

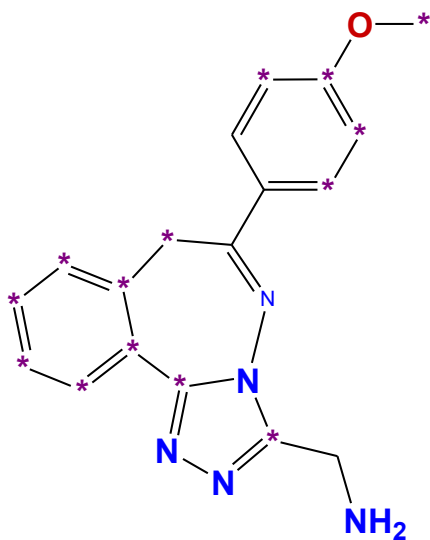

Code  
Target

RD-0014  
ADRA2A

**Record 25**  
Structure

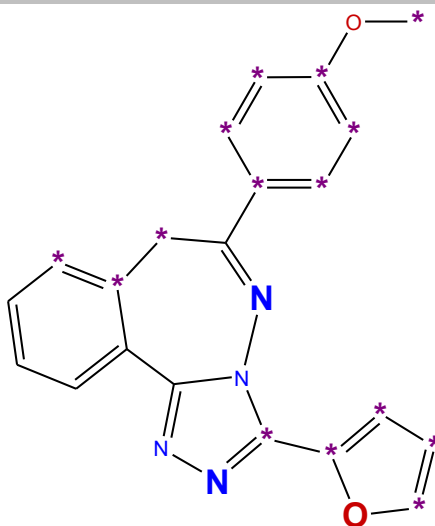

Code  
Target

RD-0004  
AGTR1

**Record 26**  
Structure

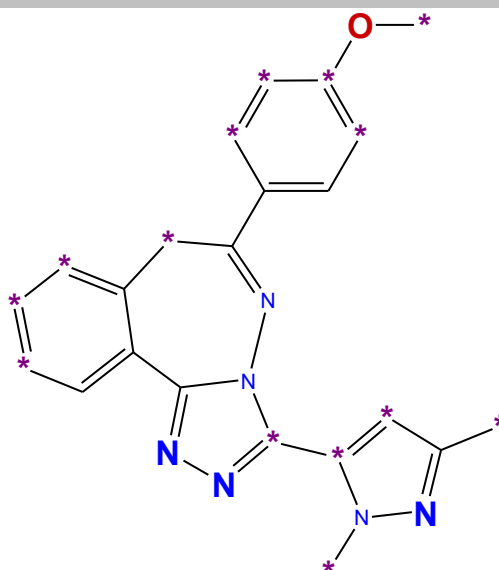

Code  
Target

RD-0012  
AGTR1

**Record 27**

Structure

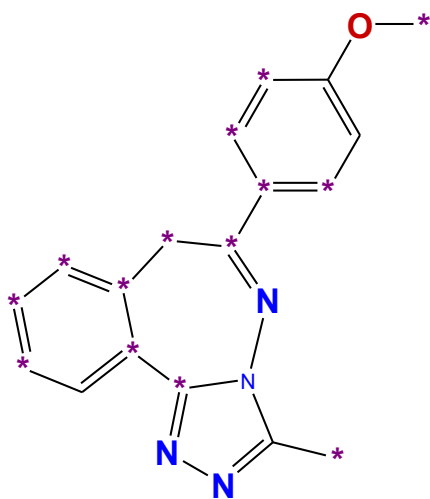

RD-0013  
AGTR1

Code  
Target  
**Record 28**  
Structure

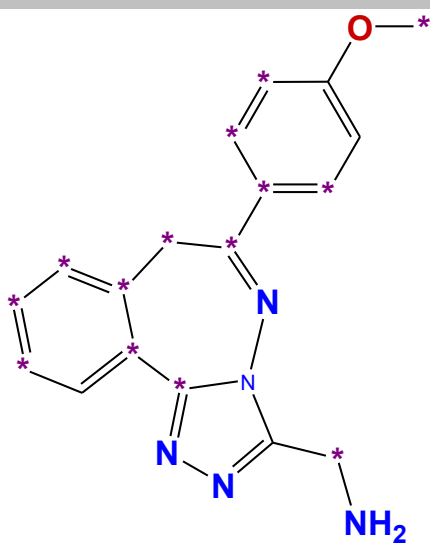

RD-0014  
AGTR1

Code  
Target  
**Record 29**  
Structure

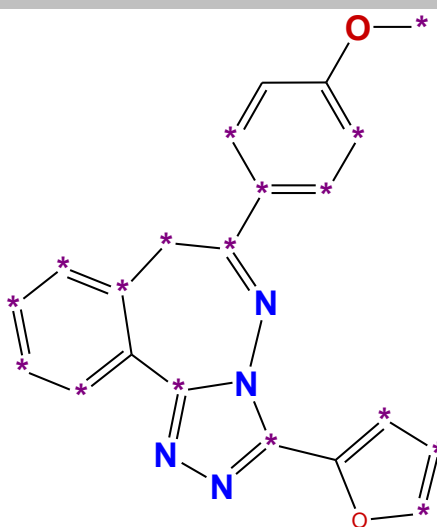

RD-0004  
NMDA-Glut

Code  
Target  
**Record 30**

Structure

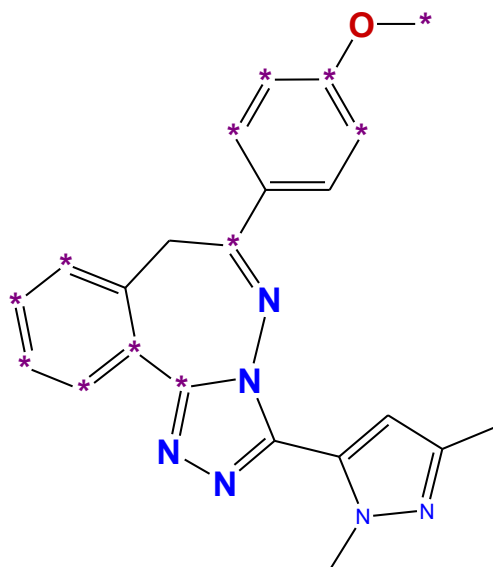

RD-0012  
NMDA-Glut

Code  
Target  
**Record 31**  
Structure

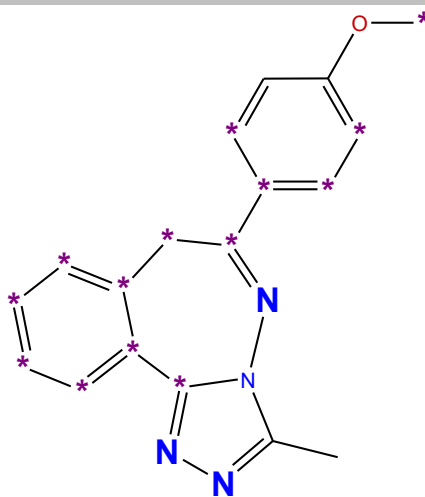

RD-0013  
NMDA-Glut

Code  
Target  
**Record 32**  
Structure

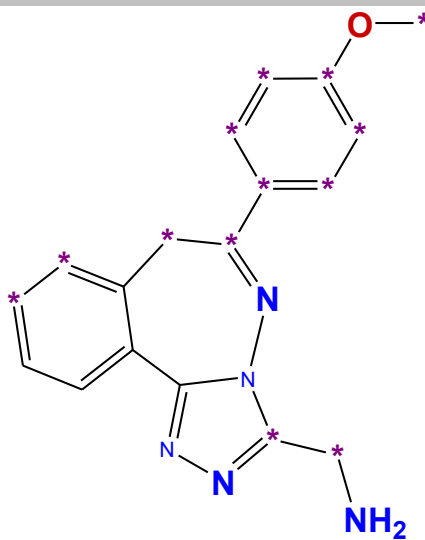

RD-0014  
NMDA-Glut

Code  
Target
