# Supplementary material for: Consensus Ensemble Multitarget Neural Network Model of Anxiolytic Activity of Chemical Compounds and Its Use for Multitarget Pharmacophore Design
Source: MDPI journal article supplement (doi:10.3390/ph16050731), 2023-05-11
Supplement: s1 [file s1]

**Table S2.** The chemotypes of the studied derivatives of nitrogen-containing condensed heterocycles.

|                                                                                     |                                                                                      |                                                                                       |
|-------------------------------------------------------------------------------------|--------------------------------------------------------------------------------------|---------------------------------------------------------------------------------------|
| 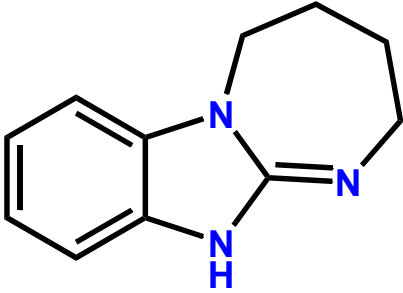   |    |    |
| 2,3,4,5-tetrahydro-1H-[1,3]diazepino[1,2-a]benzimidazole                            | 1,4-diaza-9-azoniatetracyclo[7.6.1.0.4,16.0.10,15]hexadeca-2,9(16),10,12,14-pentaene | 5H-2,3-benzodiazepine                                                                 |
| Chemotype weight: 70                                                                | Chemotype weight: 6                                                                  | Chemotype weight: 11                                                                  |
|    |     |    |
| Quinoline                                                                           | Quinoxaline                                                                          | Quinazoline                                                                           |
| Chemotype weight: 10                                                                | Chemotype weight: 25                                                                 | Chemotype weight: 10                                                                  |
|   |   |   |
| 1,2,3,4-tetrahydropyrazino[1,2-a]benzimidazole                                      | 2,3,4,5-tetrahydro-1H-[1,4]diazepino[1,2-a]benzimidazole                             | 4-[2-(2-aminoethyl)phenyl]-1,3-thiazol-2-amine                                        |
| Chemotype weight: 15                                                                | Chemotype weight: 5                                                                  | Chemotype weight: 10                                                                  |
|  |   |  |
| 1,3-dihydrobenzimidazole-2-thione                                                   | 1H-indole                                                                            | Oxindole                                                                              |
| Chemotype weight: 12                                                                | Chemotype weight: 5                                                                  | Chemotype weight: 5                                                                   |
|  |  |  |
| 1H-benzimidazole                                                                    | 9H-imidazo[1,2-a]benzimidazole                                                       | 7H-[1,2,4]triazolo[3,4-a][2,3]benzodiazepine                                          |
| Chemotype weight: 10                                                                | Chemotype weight: 10                                                                 | Chemotype weight: 10                                                                  |
