# Supplementary material for: Consensus Ensemble Multitarget Neural Network Model of Anxiolytic Activity of Chemical Compounds and Its Use for Multitarget Pharmacophore Design
Source: MDPI journal article supplement (doi:10.3390/ph16050731), 2023-05-11
Supplement: s1 [file s1]

**Table S4.** Numbers of 3D models of anxiolytic biotargets relevant to chemotypes of nitrogen-containing heterocycles.

| Target               | Name                                         | X-Ray <sup>1</sup> | Model <sup>2</sup> |
|----------------------|----------------------------------------------|--------------------|--------------------|
| SLC18A2              | Synaptic vesicular amine transporter (VMAT2) | 0                  | 1                  |
| HTR1A                | 5-hydroxytryptamine receptor 1A              | 3                  | 1                  |
| MTNR1A               | Melatonin receptor type 1A (MT1)             | 4                  | 1                  |
| MTNR1B               | Melatonin receptor type 1B (MT2)             | 4                  | 1                  |
| GRIN1/GRIN2A/GRIN2B  | NMDA receptor GluN1/GluN2A/GluN2B            | 1                  | 0                  |
| ADRA2B               | Alpha-2B adrenergic receptor                 | 2                  | 1                  |
| HTR7                 | 5-hydroxytryptamine receptor 7               | 0                  | 1                  |
| AGTR1                | Type-1 angiotensin II receptor               | 6                  | 1                  |
| ADRA1A               | Alpha-1A adrenergic receptor                 | 0                  | 1                  |
| ADRA1B               | Alpha-1B adrenergic receptor                 | 0                  | 1                  |
| ADRA2A               | Alpha-2A adrenergic receptor                 | 2                  | 1                  |
| GABRA1/GABRB2/GABRG2 | GABA-A receptor alpha1-beta2-gamma2          | 2                  | 1                  |
| HTR4                 | 5-hydroxytryptamine receptor 4               | 0                  | 1                  |
| HTR2A                | 5-hydroxytryptamine receptor 2A              | 5                  | 2                  |
| Total                |                                              | 29                 | 14                 |

<sup>1</sup> Number of experimental models found in PDBe and RCSB PDB.

<sup>2</sup> Number of theoretical models constructed by homology modeling.
