# Supplementary material for: Consensus Ensemble Multitarget Neural Network Model of Anxiolytic Activity of Chemical Compounds and Its Use for Multitarget Pharmacophore Design
Source: MDPI journal article supplement (doi:10.3390/ph16050731), 2023-05-11
Supplement: s1 [file s1]

**Table S3.** Significant anxiolytic biotargets of chemotypes of nitrogen-containing heterocycles.

| Target                                       | Genes                | Ind <sub>Gen</sub> <sup>1</sup> | Ind <sub>Max</sub> <sup>2</sup> | Chemotype                      |
|----------------------------------------------|----------------------|---------------------------------|---------------------------------|--------------------------------|
| Synaptic vesicular amine transporter (VMAT2) | SLC18A2              | 2.50                            | 2.50                            | Diazepinobenzimidazole         |
| 5-hydroxytryptamine receptor 1A              | HTR1A                | 1.95                            | 2.80                            | Benzodiazepine                 |
| Melatonin receptor type 1A (MT1)             | MTNR1A               | 1.15                            | 2.69                            | Oxindole                       |
| Melatonin receptor type 1B (MT2)             | MTNR1B               | 1.15                            | 2.64                            | Imidazobenzimidazole           |
| NMDA receptor GluN1/GluN2A/GluN2B            | GRIN1/GRIN2A/GRIN2B  | 1.05                            | 3.80                            | Diazepinobenzimidazole         |
| Alpha-2B adrenergic receptor                 | ADRA2B               | 1.04                            | 2.65                            | Diazepinobenzimidazole         |
| 5-hydroxytryptamine receptor 7               | HTR7                 | 1.00                            | 1.00                            | Diazepinobenzimidazole         |
| Type-1 angiotensin II receptor               | AGTR1                | 1.00                            | 1.00                            | Diazepinobenzimidazole         |
| Alpha-1A adrenergic receptor                 | ADRA1A               | 1.00                            | 1.00                            | Diazepinobenzimidazole         |
| Alpha-1B adrenergic receptor                 | ADRA1B               | 1.00                            | 1.00                            | Diazepinobenzimidazole         |
| Alpha-2A adrenergic receptor                 | ADRA2A               | 1.00                            | 1.00                            | Diazepinobenzimidazole         |
| GABA-A receptor alpha1-beta2-gamma2          | GABRA1/GABRB2/GABRG2 | 0.65                            | 3.82                            | Benzimidazole                  |
| 5-hydroxytryptamine receptor 4               | HTR4                 | 0.03                            | 3.27                            | Triazabenzocyclopentaazulenium |
| 5-hydroxytryptamine receptor 2A              | HTR2A                | -0.68                           | 2.60                            | Quinoline                      |

<sup>1</sup> The general average value of the activity level index for all chemotypes.

<sup>2</sup> The maximum average value of the activity level index for a given chemotype.
