# Supplementary material for: Consensus Ensemble Multitarget Neural Network Model of Anxiolytic Activity of Chemical Compounds and Its Use for Multitarget Pharmacophore Design
Source: MDPI journal article supplement (doi:10.3390/ph16050731), 2023-05-11
Supplement: s1 [file s1]

**Table S1.** Homo sapiens biotargets relevant to anxiolytic activity and having reliable confirmation in the form of experimental data on the activity of known compounds.

| No | Targets                                               | Genes   | Main UniProt ID |                 |                          | Main UniProt Name                                                    |
|----|-------------------------------------------------------|---------|-----------------|-----------------|--------------------------|----------------------------------------------------------------------|
| 1  | 5-HT1                                                 | HTR1A   | P08908          |                 |                          | 5-hydroxytryptamine receptor 1A                                      |
| 2  | 5-HTA / 5-HT2C                                        | HTR1A   | HTR2C           | P08908 / P28335 |                          | 5-hydroxytryptamine receptor 1A / 5-hydroxytryptamine receptor 2C    |
| 3  | 5-HT4A                                                | HTR4A   | Q13639          |                 |                          | 5-hydroxytryptamine receptor 4A                                      |
| 4  | 5-HT4B                                                | HTR4B   | Q13639          |                 |                          | 5-hydroxytryptamine receptor 4B                                      |
| 5  | 5-HT4D                                                | HTR4D   | Q13639          |                 |                          | 5-hydroxytryptamine receptor 4D                                      |
| 6  | 5-HT4HB                                               | HTR4B   | Q13639          |                 |                          | 5-hydroxytryptamine receptor 4B                                      |
| 7  | 5-HT7                                                 | HTR7    | P34969          |                 |                          | 5-hydroxytryptamine receptor 7                                       |
| 8  | 5-HT7I                                                | HTR7    | P34969          |                 |                          | 5-hydroxytryptamine receptor 7                                       |
| 9  | 5-HT7S                                                | HTR7    | P34969          |                 |                          | 5-hydroxytryptamine receptor 7                                       |
| 10 | 5-hydroxytryptamine receptor 1a (5-HT1A)              | HTR1A   | P08908          |                 |                          | 5-hydroxytryptamine receptor 1A                                      |
| 11 | 5-hydroxytryptamine receptor 1b                       | HTR1B   | P28222          |                 |                          | 5-hydroxytryptamine receptor 1B                                      |
| 12 | 5-hydroxytryptamine receptor 1d                       | HTR1D   | P28221          |                 |                          | 5-hydroxytryptamine receptor 1D                                      |
| 13 | 5-hydroxytryptamine receptor 2a (5-HT2A)              | HTR2A   | P28223          |                 |                          | 5-hydroxytryptamine receptor 2A                                      |
| 14 | 5-hydroxytryptamine receptor 2b (5HT2b)               | HTR2B   | P41595          |                 |                          | 5-hydroxytryptamine receptor 2B                                      |
| 15 | 5-hydroxytryptamine receptor 2c (5HT2c)               | HTR2C   | P28335          |                 |                          | 5-hydroxytryptamine receptor 2C                                      |
| 16 | 5-hydroxytryptamine receptor 2c (5-HT2c)              | HTR2C   | P28335          |                 |                          | 5-hydroxytryptamine receptor 2C                                      |
| 17 | 5-hydroxytryptamine receptor 2c                       | HTR2C   | P28335          |                 |                          | 5-hydroxytryptamine receptor 2C                                      |
| 18 | 5-hydroxytryptamine receptor 6 (5-HT6)                | HTR6    | P50406          |                 |                          | 5-hydroxytryptamine receptor 6                                       |
| 19 | 5-hydroxytryptamine receptor 7 (5-HT7)                | HTR7    | P34969          |                 |                          | 5-hydroxytryptamine receptor 7                                       |
| 20 | adrenergic alpha1                                     | ADRA1A  | P35348          |                 |                          | Alpha-1A adrenergic receptor                                         |
| 21 | adrenergic beta-2 receptor (&beta;2)                  | ADRB2   | P07550          |                 |                          | Beta-2 adrenergic receptor                                           |
| 22 | adrenergic beta-2 receptor (beta2)                    | ADRB2   | P07550          |                 |                          | Beta-2 adrenergic receptor                                           |
| 23 | adrenergic receptor alpha                             | ADRA1A  | ADRA1B          | ADRA1D          | P35348 / P35368 / P25100 | Alpha-1A / Alpha-1B / Alpha-1D adrenergic receptor                   |
| 24 | adrenergic receptor alpha-1                           | ADRA1A  | P35348          |                 |                          | Alpha-1A adrenergic receptor                                         |
| 25 | adrenergic receptor beta                              | ADRB1   | ADRB2           | ADRB3           | P08588 / P07550 / A8KAG8 | Beta-1 / Beta-2 / Beta-3 adrenergic receptor                         |
| 26 | adrenergic receptor                                   | —       | —               |                 |                          | Adrenergic receptor                                                  |
| 27 | adrenergic receptors; alpha-1 a & b                   | ADRA1A  | ADRA1B          | P35348 / P35368 |                          | Alpha-1A / Alpha-1B adrenergic receptor                              |
| 28 | adrenergic, alpha-2b-, receptor [homo sapiens]        | ADRA2B  | P18089          |                 |                          | Alpha-2B adrenergic receptor                                         |
| 29 | aldehyde dehydrogenase (aldh2)                        | ALDH2   | P05091          |                 |                          | Aldehyde dehydrogenase, mitochondrial                                |
| 30 | alpha-1a adrenergic receptor                          | ADRA1A  | P35348          |                 |                          | Alpha-1A adrenergic receptor                                         |
| 31 | alpha-1b adrenergic receptor                          | ADRA1B  | P35368          |                 |                          | Alpha-1B adrenergic receptor                                         |
| 32 | alpha-1d adrenergic receptor                          | ADRA1D  | ADRA1A          | P25100          |                          | Alpha-1D adrenergic receptor                                         |
| 33 | alpha-2a adrenergic receptor [homo sapiens]           | ADRA2A  | P08913          |                 |                          | Alpha-2A adrenergic receptor                                         |
| 34 | angiotensin ii receptor                               | AGTR2   | P50052          |                 |                          | Type-2 angiotensin II receptor                                       |
| 35 | angiotensin ii type 1a (at-1a)/1b (at-1b) receptor    | AGTR1   | P30556          |                 |                          | Type-1 angiotensin II receptor                                       |
| 36 | angiotensin-converting enzyme                         | ACE     | P12821          |                 |                          | Angiotensin-converting enzyme                                        |
| 37 | cannabinoid cb1 receptor                              | CNR1    | P21554          |                 |                          | Cannabinoid receptor 1                                               |
| 38 | cannabinoid cb1 receptor/orixin receptor 1 complex    | CNR1    | HCRT1R          | P21554 / O43613 |                          | Cannabinoid receptor 1 / Orixin receptor type 1                      |
| 39 | cannabinoid receptor 1                                | CNR1    | P21554          |                 |                          | Cannabinoid receptor 1                                               |
| 40 | carbonic anhydrase 2                                  | CA2     | P00918          |                 |                          | Carbonic anhydrase 2                                                 |
| 41 | carbonic anhydrase 4                                  | CA4     | P22748          |                 |                          | Carbonic anhydrase 4                                                 |
| 42 | corticotropin releasing factor receptor 1             | CRHR1   | P34998          |                 |                          | Corticotropin-releasing factor receptor 1                            |
| 43 | corticotropin releasing factor-binding protein        | CRHBP   | P24387          |                 |                          | Corticotropin-releasing factor-binding protein                       |
| 44 | gaba a alpha4beta2gamma2                              | GABRA4  | GABRB2          | GABRG2          | P48169 / P47870 / P18507 | Gamma-aminobutyric acid receptor subunits alpha-4 / beta-2 / gamma-2 |
| 45 | gaba a receptor alpha-1/beta-1/gamma-2                | GABRA1  | GABRB1          | GABRG2          | P14867 / P18505 / P18507 | Gamma-aminobutyric acid receptor subunits alpha-1 / beta-1 / gamma-2 |
| 46 | gaba a receptor alpha-3/beta-2/gamma-2                | GABRA3  | GABRB2          | GABRG2          | P34903 / P47870 / P18507 | Gamma-aminobutyric acid receptor subunits alpha-3 / beta-2 / gamma-2 |
| 47 | gaba a receptor alpha-4/beta-3/gamma-2                | GABRA4  | GABRB3          | GABRG2          | P48169 / P28472 / P18507 | Gamma-aminobutyric acid receptor subunits alpha-4 / beta-3 / gamma-2 |
| 48 | gaba a receptor alpha-6/beta-2/gamma-2                | GABRA6  | GABRB2          | GABRG2          | Q16445 / P47870 / P18507 | Gamma-aminobutyric acid receptor subunits alpha-6 / beta-2 / gamma-2 |
| 49 | gaba receptor alpha-1/beta-1/gamma-2 subunit          | GABRA1  | GABRB1          | GABRG2          | P14867 / P18505 / P18507 | Gamma-aminobutyric acid receptor subunits alpha-1 / beta-1 / gamma-2 |
| 50 | gaba receptor alpha-1/beta-2/gamma-2 subunit          | GABRA1  | GABRB2          | GABRG2          | P14867 / P47870 / P18507 | Gamma-aminobutyric acid receptor subunits alpha-1 / beta-2 / gamma-2 |
| 51 | gaba receptor alpha-1/beta-3/gamma-2 subunit          | GABRA1  | GABRB3          | GABRG2          | P14867 / P28472 / P18507 | Gamma-aminobutyric acid receptor subunits alpha-1 / beta-3 / gamma-2 |
| 52 | gaba receptor alpha-2/beta-2/gamma-2 subunit          | GABRA2  | GABRB2          | GABRG2          | P47869 / P47870 / P18507 | Gamma-aminobutyric acid receptor subunits alpha-2 / beta-2 / gamma-2 |
| 53 | gaba receptor alpha-2/beta-3/gamma-2 subunit          | GABRA2  | GABRB3          | GABRG2          | P47869 / P28472 / P18507 | Gamma-aminobutyric acid receptor subunits alpha-2 / beta-3 / gamma-2 |
| 54 | gaba receptor alpha-3/beta-2/gamma-2 subunit          | GABRA3  | GABRB2          | GABRG2          | P34903 / P47870 / P18507 | Gamma-aminobutyric acid receptor subunits alpha-3 / beta-2 / gamma-2 |
| 55 | gaba receptor alpha-3/beta-3/gamma-2 subunit          | GABRA3  | GABRB3          | GABRG2          | P34903 / P28472 / P18507 | Gamma-aminobutyric acid receptor subunits alpha-3 / beta-3 / gamma-2 |
| 56 | gaba receptor alpha-4/beta-3/gamma-2 subunit          | GABRA4  | GABRB3          | GABRG2          | P48169 / P28472 / P18507 | Gamma-aminobutyric acid receptor subunits alpha-4 / beta-3 / gamma-2 |
| 57 | gaba receptor alpha-5/beta-3/gamma-2 subunit          | GABRA5  | GABRB3          | GABRG2          | P31644 / P28472 / P18507 | Gamma-aminobutyric acid receptor subunits alpha-5 / beta-3 / gamma-2 |
| 58 | gaba receptor alpha-6/beta-3/gamma-2 subunit          | GABRA5  | GABRB3          | GABRG2          | Q16445 / P28472 / P18507 | Gamma-aminobutyric acid receptor subunits alpha-6 / beta-3 / gamma-2 |
| 59 | gaba receptor beta-3 subunit                          | GABRB3  | P28472          |                 |                          | Gamma-aminobutyric acid receptor subunit beta-3                      |
| 60 | gaba receptor rho-2 subunit                           | GABRR2  | P28476          |                 |                          | Gamma-aminobutyric acid receptor subunit rho-2                       |
| 61 | glutamate [nmda] receptor subunit epsilon 1/zeta 1    | GRIN2A  | GRIN1           | Q12879 / Q05586 |                          | Glutamate receptor ionotropic, NMDA 2A / NMDA 1                      |
| 62 | glutamate [nmda] receptor subunit epsilon 2           | GRIN2B  | Q13224          |                 |                          | Glutamate receptor ionotropic, NMDA 2B                               |
| 63 | glutamate [nmda] receptor subunit epsilon 2/zeta 1    | GRIN2B  | GRIN1           | Q13224 / Q05586 |                          | Glutamate receptor ionotropic, NMDA 2B / NMDA 1                      |
| 64 | glutamate [nmda] receptor subunit epsilon 4           | GRIN2D  | Q15399          |                 |                          | Glutamate receptor ionotropic, NMDA 2D                               |
| 65 | glutamate [nmda] receptor                             | —       | —               |                 |                          | Glutamate receptor ionotropic, NMDA                                  |
| 66 | glyceraldehyde-3-phosphate dehydrogenase liver        | GAPDH   | P04406          |                 |                          | Glyceraldehyde-3-phosphate dehydrogenase                             |
| 67 | glycine receptor (alpha-1/beta)                       | GLRA1   | GLRB            | P23415 / P48167 |                          | Glycine receptor subunits alpha-1 / beta                             |
| 68 | histamine h1 receptor                                 | HRH1    | P35367          |                 |                          | Histamine H1 receptor                                                |
| 69 | histamine h2 receptor                                 | HRH2    | P25021          |                 |                          | Histamine H2 receptor                                                |
| 70 | insulin receptor                                      | INSR    | P06213          |                 |                          | Insulin receptor                                                     |
| 71 | melatonin receptor                                    | MTNR1A  | P48039          |                 |                          | Melatonin receptor type 1A                                           |
| 72 | mitochondrial complex i (nadh dehydrogenase)          | —       | —               |                 |                          | NADH dehydrogenase                                                   |
| 73 | muscarinic acetylcholine receptor                     | CHRM1   | P11229          |                 |                          | Muscarinic acetylcholine receptor M1                                 |
| 74 | nadh-ubiquinone oxidoreductase mlrq subunit           | NDUFA4  | O00483          |                 |                          | Cytochrome c oxidase subunit NDUFA4                                  |
| 75 | opioid receptors; mu/kappa/delta                      | OPRM1   | OPRK1           | OPRD1           | P35372 / P41145 / P41143 | Mu-type / Kappa-type / Delta-type opioid receptor                    |
| 76 | potassium channel subfamily k member 9                | KCNK9   | Q9NPC2          |                 |                          | Potassium channel subfamily K member 9                               |
| 77 | progesterone                                          | PGR     | P06401          |                 |                          | Progesterone receptor                                                |
| 78 | secretin receptor                                     | SCTR    | P47872          |                 |                          | Secretin receptor                                                    |
| 79 | sodium channel protein type i alpha subunit           | SCN1A   | P35498          |                 |                          | Sodium channel protein type 1 subunit alpha                          |
| 80 | sodium channel protein type i i alpha subunit         | SCN2A   | Q99250          |                 |                          | Sodium channel protein type 2 subunit alpha                          |
| 81 | sodium channel protein type iii alpha subunit         | SCN3A   | Q9NY46          |                 |                          | Sodium channel protein type 3 subunit alpha                          |
| 82 | sodium channel protein type xi alpha subunit          | SCN9A   | Q15858          |                 |                          | Sodium channel protein type 9 subunit alpha                          |
| 83 | synaptic vesicular amine transporter                  | SLC18A2 | Q05940          |                 |                          | Synaptic vesicular amine transporter                                 |
| 84 | tacr1                                                 | TACR1   | P25103          |                 |                          | Substance-P receptor                                                 |
| 85 | vasopressin v1 receptor                               | AVPR1B  | P47901          |                 |                          | Vasopressin V1b receptor                                             |
| 86 | vasopressin v1a receptor (v1a)                        | AVPR1A  | P37288          |                 |                          | Vasopressin V1a receptor                                             |
| 87 | voltage-gated calcium channel                         | —       | —               |                 |                          | Voltage-dependent L-type calcium channel                             |
| 88 | voltage-gated l-type calcium channel alpha-1c subunit | CACNA1C | Q13936          |                 |                          | Voltage-dependent L-type calcium channel subunit alpha-1C            |
| 89 | voltage-gated l-type calcium channel                  | —       | —               |                 |                          | Voltage-dependent L-type calcium channel                             |
| 90 | voltage-gated n-type calcium channel alpha-1b subunit | CACNA1B | Q00975          |                 |                          | Voltage-dependent N-type calcium channel subunit alpha-1B            |
| 91 | voltage-gated t-type calcium channel alpha-1g subunit | CACNA1G | O43497          |                 |                          | Voltage-dependent T-type calcium channel subunit alpha-1G            |
| 92 | voltage-gated t-type calcium channel                  | —       | —               |                 |                          | Voltage-dependent L-type calcium channel                             |
